# Supplementary material for: Thirty Years of Evidence on the Efficacy of Drug Treatments for Chronic Heart Failure With Reduced Ejection Fraction: A Network Meta-Analysis
Source: PubMed Central journal article supplement — Circ Heart Fail. 2017 Jan 13;10(1):e003529. doi: 10.1161/CIRCHEARTFAILURE.116.003529 (PMC5265698; doi:10.1161/circheartfailure.116.003529), 2017-01-13
Supplement: hhf-10-e003529-s001.pdf [file hhf-10-e003529-s001.pdf]

## **SUPPLEMENTAL MATERIAL**

## Expanded Methods & Results

### Search Strategy

**Databases:** Ovid MEDLINE(R) In-Process & Other Non-Indexed Citations and Ovid MEDLINE(R))

**Date of search:** April 28, 2015

1. exp Heart Failure/
2. Cardiomyopathy, Dilated/
3. (heart failure or cardiac failure or cardiac insufficiency or cardiomyopath\$.tw.
4. ((cardi\$ or myocard\$) adj2 (failure\$ or insufficien\$)).tw.
5. OR/1-4
6. (LCZ696 or LCZ 696 or LCZ-696).af
7. exp dipeptidyl carboxypeptidase inhibitor/ OR exp Angiotensin-Converting Enzyme Inhibitors/
8. (angiotensin converting enzyme inhibitor OR ACEI OR ACEI OR antagonist\$ OR inhibitor\$ benazepril OR captopril OR enalapril OR fosinopril OR imidapril OR lisinopril OR moexipril OR perindopril OR quinapril OR ramipril ORtrandolapril OR zofenopril OR alacepril OR cilazapril OR spirapril OR delapril).mp.
9. exp beta adrenergic receptor blocking agent/ OR exp Adrenergic beta-Antagonists/
10. (beta blocker\$ OR BB OR acebutolol OR atenolol OR betaxolol OR bisoprolol OR carvedilol OR labetalol OR metoprolol OR nadolol OR nebivolol OR penbutolol OR pindolol OR propranolol OR sotalol OR timolol).mp.
11. exp aldosterone antagonist/

12. (aldosterone antagonist\$ OR mineralocorticoid-receptor antagonist OR MRA OR eplerenone OR spironolactone).mp.
13. exp angiotensin receptor antagonist/
14. (angiotensin receptor blocker\$ OR angiotensin receptor antagonist\$ OR ARB OR azilsartan OR candesartan OR eprosartan OR irbesartan OR losartan OR olmesartan OR telmisartan OR valsartan).mp.
15. OR/6-14
16. "randomized controlled trial".pt.
17. (random\$ or placebo\$ or single blind\$ or double blind\$ or triple blind\$).ti,ab.
18. (retraction of publication or retracted publication).pt.
19. OR/18-20
20. (animals not humans).sh.
21. ((comment or editorial or meta-analysis or practice-guideline or review or letter or journal correspondence) not "randomized controlled trial").pt.
22. (random sampl\$ or random digit\$ or random effect\$ or random survey or random regression).ti,ab. not "randomized controlled trial".pt.
23. 20 OR 21 OR 22
24. 19 NOT 23
25. (random\$ or placebo\$ or single blind\$ or double blind\$ or triple blind\$).ti,ab.
26. RETRACTED ARTICLE/
27. OR/25-26
28. (animal\$ not human\$).sh,hw.

29. (book or conference paper or editorial or letter or review).pt. not exp randomized controlled trial/
30. (random sampl\$ or random digit\$ or random effect\$ or random survey or random regression).ti,ab. not exp randomized controlled trial/
31. OR/28-30
32. 27 NOT 31
33. 24 OR 32
34. 5 AND 19 AND 33
35. limit 34 to "all adult (19 plus years)" [Limit not valid in Embase; records were retained]
36. limit 35 to (adult <18 to 64 years> or aged <65+ years>) [Limit not valid in Ovid MEDLINE(R),Ovid MEDLINE(R) In-Process; records were retained]
37. limit 36 to human
38. limit 37 to yr="1987 –July 2014"

**Database:** Cochrane Library of Clinical Trials

**Date of search:** April 28, 2015

- #1 MeSH descriptor: [Heart Failure] explode all trees
- #2 MeSH descriptor: [Cardiomyopathy, Dilated] explode all trees
- #3 (heart failure or cardiac failure or cardiac insufficiency or cardiomyopath\$):ti,ab,kw  
(Word variations have been searched)
- #4 #1 or #2 or #3
- #5 (LCZ696 or LCZ 696 or LCZ-696) :ti,ab,kw
- #6 MeSH descriptor: [Angiotensin-Converting Enzyme Inhibitors] explode all trees

- #7 (angiotensin converting enzyme inhibitor or ACEI or ACEI or antagonist\$ or inhibitor\$  
benazepril or captopril or enalapril or fosinopril or imidapril or lisinopril or moexipril or  
perindopril or quinapril or ramipril ortrandolapril or zofenopril or alacepril or cilazapril  
or spirapril or delapril):ti,ab,kw (Word variations have been searched)
- #8 MeSH descriptor: [Adrenergic beta-Antagonists] explode all trees
- #9 (beta blocker\$ or BB or acebutolol or atenolol or betaxolol or bisoprolol or carvedilol or  
labetalol or metoprolol or nadolol or nebivolol or penbutolol or pindolol or propranolol or  
sotalol or timolol):ti,ab,kw (Word variations have been searched)
- #10 MeSH descriptor: [Mineralocorticoid Receptor Antagonists] explode all trees
- #11 (aldosterone antagonist\$ or mineralocorticoid-receptor antagonist or MRA or eplerenone  
or spironolactone):ti,ab,kw (Word variations have been searched)
- #12 MeSH descriptor: [Angiotensin Receptor Antagonists] explode all trees
- #13 (angiotensin receptor blocker\$ or angiotensin receptor antagonist\$ or ARB or azilsartan  
or candesartan or eprosartan or irbesartan or losartan or olmesartan or telmisartan or  
valsartan):ti,ab,kw (Word variations have been searched)
- #14 #6 or #7 or #8 or #9 or #10 or #11 or #12 or #13
- #15 #4 and #14
- #16 human not animal
- #17 #15 and #16
- #18 #17 in trials
- #17 #18 (limit from 1987)

## Supplementary Table 1: Drug classes of interest

| Class | Generic name                    | Trade Name                                                                                                                                                                                                                               |
|-------|---------------------------------|------------------------------------------------------------------------------------------------------------------------------------------------------------------------------------------------------------------------------------------|
| ARNI  | LCZ696<br>valsartan/ sacubitril | Entresto                                                                                                                                                                                                                                 |
| ACEI  | benazepril                      | Lotensin                                                                                                                                                                                                                                 |
|       | captopril                       | Capoten, Lopril                                                                                                                                                                                                                          |
|       | enalapril                       | Vasotec, Renitec                                                                                                                                                                                                                         |
|       | fosinopril                      | Monopril                                                                                                                                                                                                                                 |
|       | imidapril                       | Tanatril                                                                                                                                                                                                                                 |
|       | lisinopril                      | Prinivil, Zestril, Tensopril, Hipril, Lisodur, Novatec                                                                                                                                                                                   |
|       | moexipril                       | Univasc, Perdix                                                                                                                                                                                                                          |
|       | perindopril                     | Aceon, Coversyl                                                                                                                                                                                                                          |
|       | quinapril                       | Accupril                                                                                                                                                                                                                                 |
|       | ramipril                        | Altace, Tritace, Ramace, Ramiwin, Prilace, Ramipro                                                                                                                                                                                       |
|       | trandolapril                    | Mavik                                                                                                                                                                                                                                    |
|       | zofenopril                      | Bifril, Teoula, Zofepiril, Zopranol                                                                                                                                                                                                      |
|       | alacepril                       | Alacepul, Alaceril, Aprocorl, Asemipearl, Cenapride, Cetabavil, Cetapril, Cevozyl, Homerat, Iceden, Kananomin, Seplinok                                                                                                                  |
|       | cilazapril                      | Cazaprol, Cilan, Cilazabace, Cilazil, Dynorm, Dynorm Plus, Inhibace Plus, Inhibace, Initiss, Inocar, Justor, Prilazid, Vaspace, Zobox, Cilazapril-Teva, CO Cilazapril, Gen-Cilazapril, Inhirook, Inibace Plus, Initiss Plus, Inocar Plus |
|       | spirapril                       | Quadropril, Renormax, Renpress, Setrilan                                                                                                                                                                                                 |
|       | delapril                        | Beniod, Delaket, Delapride, Dinapres, Trinordiol, Adecut, Araplit, Cupressin, Defolder, Virace                                                                                                                                           |
| BB    | acebutolol                      | Sectral, Prent                                                                                                                                                                                                                           |
|       | atenolol                        | Tenormin, Senormin                                                                                                                                                                                                                       |
|       | betaxolol                       | Kerlone, Betoptic, Lokren                                                                                                                                                                                                                |
|       | bisoprolol                      | Zebeta                                                                                                                                                                                                                                   |
|       | carvedilol                      | Coreg, Carvil, Dilatrend, Eucardic, Carloc                                                                                                                                                                                               |

| <b>Class</b> | <b>Generic name</b> | <b>Trade Name</b>                                                                                                                  |
|--------------|---------------------|------------------------------------------------------------------------------------------------------------------------------------|
|              | labetalol           | Trandate, Normodyne                                                                                                                |
|              | metoprolol          | Lopressor, Toprol, Selokeen, Minax, Metrol, Betaloc, Bloxan, Neobloc, Presolol, Corvitol, Metxl, Metolar, Starpress                |
|              | nadolol             | Corgard, Anabet, Solgol, Corzide, Alti-Nadolol, Apo-Nadol, Novo-Nadolol                                                            |
|              | nebivolol           | Bystolic, Nebilet, Nebilong, Nebicard, Nubeta, Nodon, Lobivon                                                                      |
|              | penbutolol          | Levatom, Levatomol, Lobeta, Paginol, Hostabloc, Betapressin                                                                        |
|              | pindolol            | Visken, Betapindol, Blockin L, Calvisken, Cardilate, Decreten, Durapindol, Glauco-Visken, Pectobloc, Pinbetol, Prindolol, Pynastin |
|              | propranolol         | Inderal, InnoPran, Avlocardyl, Deralin, Dociton, Inderalici, Sumial, Anaprilinum, Bedranol                                         |
|              | sotalol             | Betapace, Sotalex, Sotacor                                                                                                         |
|              | timolol             | Blocadren, Timoptic                                                                                                                |
| MRA          | eplerenone          | Inspira                                                                                                                            |
|              | spironolactone      | Aldactone, Novo-Spiroton, Aldactazide, Spiractin, Spirotone, Verospiron, Berlactone                                                |
| ARB          | azilsartan          | Edarbi                                                                                                                             |
|              | candesartan         | Atacand, Blopress, Amias, Ratacand                                                                                                 |
|              | eprosartan          | Teveten, Eprozar                                                                                                                   |
|              | irbesartan          | Avapro, Karvea, Aprovel                                                                                                            |
|              | losartan            | Cozaar                                                                                                                             |
|              | olmesartan          | Benicar, Olmetec                                                                                                                   |
|              | telmisartan         | Micardis, Targit, Temax, Telmore                                                                                                   |
|              | valsartan           | Diovan, Angiotan, Valtan, Valzaar, Tareg                                                                                           |

Abbreviations: ACEI = angiotensin-converting-enzyme inhibitor; ARB = angiotensin-II receptor antagonist; ARNI = angiotensin receptor-neprilysin inhibitor; BB = beta blocker; MRA = mineralocorticoid receptor antagonist; NR = not reported; PLBO = placebo

**Supplementary Table 2: Study design and baseline patient characteristics of included RCTs**

| Trial/ Author year              | Study design | # centers/ location         | Study duration     | N               | Interventions                     | LVEF inclusion criteria | mean LVEF (%) | % male | mean age | NYHA class 1 (%) | NYHA class 2 (%) | NYHA class 3 (%) | NYHA class 4 (%) | duration of HF (months) | Ischaemic HF (%) | Prior MI (%) |
|---------------------------------|--------------|-----------------------------|--------------------|-----------------|-----------------------------------|-------------------------|---------------|--------|----------|------------------|------------------|------------------|------------------|-------------------------|------------------|--------------|
| CASSIS 1995 <sup>1</sup>        | DB, MC, PC   | 18/ Czech and Slovak Rep    | 104 weeks          | 152<br>48<br>48 | Spirapril<br>Enalapril<br>Placebo | ≤40%                    | 28%           | 83%    | 58       | 0%               | 25%              | 56%              | 19%              | NR                      | 70%              | 46%          |
| CONSENSUS 1987 <sup>2</sup>     | DB, MC, PC   | 35/ Finland, Norway, Sweden | 52 weeks           | 126<br>127      | Enalapril<br>Placebo              | Reduced                 | NR            | 71%    | 70       | 0%               | 0%               | 0%               | 100%             | NR                      | NR               | 48%          |
| FEST 1995 <sup>3</sup>          | DB, MC, PC   | 42/ EU (8 countries)        | 12 weeks           | 155<br>153      | Fosinopril<br>Placebo             | ≤35%                    | 26%           | 75%    | 63       | 0%               | 65%              | 36%              | 0%               | NR                      | 71%              | NR           |
| MHFT 1991 <sup>4</sup>          | DB, SC, PC   | 1/ Germany                  | 2.7 years (median) | 83<br>87        | Captopril<br>Placebo              | ≤35%                    | 35%           | 78%    | 62       | 26%              | 50%              | 24%              | 0%               | NR                      | 58%              | 69%          |
| SOLVD-prevent 1992 <sup>5</sup> | DB, MC, PC   | 23/ US, Canada, Belgium     | 37.4 months (mean) | 2111<br>2117    | Enalapril<br>Placebo              | ≤35%                    | 28%           | 89%    | 59       | 0%               | 67%              | 33%              | 0%               | NR                      | 83%              | 80%          |
| SOLVD-treat 1991 <sup>6</sup>   | DB, MC, PC   | 23/ US, Canada, Belgium     | 48 months          | 1285<br>1284    | Enalapril<br>Placebo              | ≤35%                    | 25%           | 80%    | 61       | 11%              | 57%              | 30%              | 2%               | NR                      | 71%              | 66%          |
| Beller 1995 <sup>7</sup>        | DB, MC, PC   | 12/ US                      | 12 weeks           | 130<br>63       | Lisinopril<br>Placebo             | <45%                    | 28%           | 75%    | 60       | 0%               | 35%              | 56%              | 9%               | 36                      | NR               | 0%           |
| Brown 1995 <sup>8</sup>         | DB, MC, PC   | 41/ US                      | 24 weeks           | 116<br>125      | Fosinopril<br>Placebo             | ≤35%                    | 25%           | 80%    | 62       | 0%               | 37%              | 54%              | 9%               | NR                      | NR               | NR           |
| Chalmers 1987 <sup>9</sup>      | DB, MC, PC   | 13/ 10 countries            | 12 weeks           | 87<br>43        | Lisinopril<br>Placebo             | <45%                    | NR            | 69%    | 58       | 0%               | 22%              | 65%              | 13%              | 45                      | NR               | NR           |
| Colfer 1992 <sup>10</sup>       | DB, MC, PC   | 22/ US                      | 12 weeks           | 114<br>58       | Benazepril<br>Placebo             | ≤ 35%                   | 25%           | 83%    | 62       | 0%               | 54%              | 45%              | 1%               | 48                      | 56%              | NR           |
| Goldstein 1988 <sup>11</sup>    | DB, SC, PC   | NR/ NA                      | 26 weeks           | 104<br>100      | Captopril<br>Placebo              | ≤ 40%                   | 25%           | 82%    | 56       | 4%               | 85%              | 11%              | 1%               | 35                      | 63%              | NR           |



|                                  |                  |                                                        |              |              |                          |        |     |     |    |    |     |     |     |    |     |     |
|----------------------------------|------------------|--------------------------------------------------------|--------------|--------------|--------------------------|--------|-----|-----|----|----|-----|-----|-----|----|-----|-----|
| Lewis 1989 <sup>12</sup>         | DB,<br>MC,<br>PC | 13/ AUS,<br>EU, SA,<br>NA, Africa<br>(10<br>countries) | 12<br>weeks  | 87<br>43     | Lisinopril<br>Placebo    | NR     | 38% | NR  | NR | 0% | 22% | 64% | 14% | 48 | NR  | NR  |
| Shettigar 1999 <sup>13</sup>     | DB,<br>MC,<br>PC | 28/ US                                                 | 12<br>weeks  | 102<br>104   | Fosinopril<br>Placebo    | ≤35%   | 24% | 75% | 62 | 0% | 39% | 52% | 31% | NR | 43% | 34% |
| Veldhuisen<br>1999 <sup>14</sup> | DB,<br>MC,<br>PC | 25/<br>NtherInds,<br>Germany,<br>Belgium               | 12<br>weeks  | 182<br>62    | Imidapril<br>Placebo     | <45%   | 34% | 77% | 61 | 0% | 77% | 23% | 0%  | 35 | 63% | NR  |
| SPICE 2000 <sup>15</sup>         | DB,<br>MC,<br>PC | 270/ NA,<br>EU                                         | 12<br>weeks  | 179<br>91    | Candesartan<br>Placebo   | ≤35%   | 27% | 69% | 66 | 0% | 54% | 41% | 6%  | NR | 71% | 62% |
| STRETCH<br>1999 <sup>16</sup>    | DB,<br>MC,<br>PC | 86/<br>Germany,<br>Czech<br>Rep,<br>Slovenia           | 12<br>weeks  | 633<br>211   | Candesartan<br>Placebo   | 30-45% | 39% | 69% | 62 | 0% | 81% | 19% | 0%  | 39 | NR  | NR  |
| Mitrovic 2003 <sup>17</sup>      | DB,<br>MC,<br>PC | EU                                                     | 12<br>weeks  | 174<br>44    | Candesartan<br>Placebo   | ≤40%   | 28% | 85% | 54 | 0% | 61% | 39% | 0%  | 40 | NR  | NR  |
| ELITE I 1997 <sup>18</sup>       | DB,<br>MC        | 125/ US,<br>SA, EU                                     | 48<br>weeks  | 352<br>370   | Losartan<br>Captopril    | ≤40%   | 30% | 67% | 73 | 0% | 65% | 34% | 2%  | NR | 68% | 50% |
| ELITE II 2000 <sup>19</sup>      | DB,<br>MC        | 289/ NA,<br>SA, EU                                     | 700 days     | 1578<br>1574 | Losartan<br>Captopril    | ≤40%   | 31% | 70% | 71 | 0% | 52% | 43% | 5%  | NR | 79% | 58% |
| REPLACE<br>2001 <sup>20</sup>    | DB,<br>MC        | NR/ EU,<br>Israel                                      | 12<br>weeks  | 301<br>77    | Telmisartan<br>Enalapril | <40%   | 26% | 89% | 64 | 0% | 64% | 36% | 0%  | NR | NR  | 69% |
| Dickstein 1995 <sup>21</sup>     | DB,<br>MC        | 19/<br>Denmark,<br>Finland,<br>Norway,<br>Sweden       | 8 weeks      | 108<br>58    | Losartan<br>Enalapril    | ≤35%   | 23% | 78% | 64 | 0% | 0%  | 84% | 16% | 46 | 69% | 63% |
| Lang 1997 <sup>22</sup>          | DB,<br>MC        | 16 / NA                                                | 12<br>weeks  | 78<br>38     | Losartan<br>Enalapril    | ≤45%   | 25% | 78% | 58 | 0% | 47% | 51% | 2%  | 53 | 47% | NR  |
| CIBIS III 2008 <sup>23</sup>     | OL,<br>MC        | 128/ EU<br>and AUS<br>and Tunisia                      | 30<br>months | 505<br>505   | Bisoprolol<br>Enalapril  | ≤35%   | 29% | 68% | 72 | 0% | 49% | 51% | 0%  | 19 | NR  | 49% |

|                                      |            |                                  |                  |                   |                                                                       |         |     |     |    |    |     |     |     |    |     |     |
|--------------------------------------|------------|----------------------------------|------------------|-------------------|-----------------------------------------------------------------------|---------|-----|-----|----|----|-----|-----|-----|----|-----|-----|
| CARMEN 2004 <sup>24</sup>            | DB, MC, PC | 65/ EU                           | 18 months        | 191<br>190<br>191 | Carvedilol + Placebo<br>Enalapril + Placebo<br>Carvedilol + Enalapril | <40%    | 30% | 81% | 62 | 8% | 65% | 27% | 0%  | NR | 67% | 52% |
| CHARM-alternative 2003 <sup>25</sup> | DB, MC, PC | 618/ NA, EU                      | 3.5 years        | 1013<br>1015      | Candesartan<br>Placebo                                                | ≤40%    | 30% | 68% | 67 | 0% | 48% | 49% | 4%  | NR | 68% | 61% |
| HEAVEN 2002 <sup>26</sup>            | DB, MC, PC | NR/ Sweden                       | 12 weeks         | 70<br>71          | Valsartan<br>Enalapril                                                | ≤45%    | NR  | 53% | 67 | 0% | 70% | 30% | 0%  | 47 | 43% | NR  |
| RALES 1999 <sup>27</sup>             | DB, MC, PC | 195/ 15 countries                | 24 months (mean) | 822<br>841        | Spirololactone<br>Placebo                                             | ≤35%    | 25% | 73% | 65 | 0% | 0%  | 70% | 29% | NR | 54% | NR  |
| Val-HeFT 2001 <sup>28</sup>          | DB, MC, PC | 302/ US, EU, Africa              | 23 months (mean) | 2511<br>2499      | Valsartan<br>Placebo                                                  | <40%    | 27% | 80% | 63 | 0% | 62% | 36% | 2%  | NR | NR  | NR  |
| Hamroff 1999 <sup>29</sup>           | DB, MC     | 4/ NR                            | 6 months         | 16<br>17          | Losartan<br>Placebo                                                   | Reduced | 26% | 49% | 61 | NR | NR  | NR  | NR  | NR | 30% | NR  |
| BEST 2008 <sup>30</sup>              | DB, MC, PC | 90/ US and Canada                | 3 years          | 1354<br>1354      | Bucindolol<br>Placebo                                                 | ≤35%    | 23% | 78% | 60 | 0% | 0%  | 92% | 8%  | 37 | 42% | NR  |
| CIBIS I 1994 <sup>31</sup>           | DB, MC, PC | NR/ EU                           | 2 years          | 320<br>321        | Bisoprolol<br>Placebo                                                 | < 40%   | 17% | 83% | 60 | 0% | 0%  | 95% | 5%  | 38 | 54% | 47% |
| CIBIS II 1999 <sup>32</sup>          | DB, MC, PC | 47/<br>Western and Eastern<br>EU | 1.3 years (mean) | 1327<br>1320      | Bisoprolol<br>Placebo                                                 | ≤35%    | 28% | 81% | 61 | 0% | 0%  | 83% | 17% | 43 | 50% | NR  |
| CELICARD 2000 <sup>33</sup>          | DB, MC, PC | NR/<br>France, Poland            | 1 year           | 62<br>62          | Celiprolol<br>Placebo                                                 | <40%    | 26% | 90% | 57 | 0% | 57% | 43% | 1%  | NR | NR  | 40% |
| COPERNICUS 2001 <sup>34</sup>        | DB, MC, PC | 334/ NA, EU, AUS                 | 28.7 months      | 1156<br>1133      | Carvedilol<br>Placebo                                                 | <25%    | 20% | 79% | 63 | 0% | NR  | NR  | NR  | NR | 67% | NR  |
| ENECA 2005 <sup>35</sup>             | DB, MC, PC | 70/ NR                           | 48 weeks         | 134<br>126        | Nebivolol<br>Placebo                                                  | ≤35%    | 26% | 73% | 72 | 0% | 49% | 47% | 5%  | NR | NR  | 58% |

|                                     |            |                           |             |              |                          |       |     |     |    |    |     |     |     |    |     |     |
|-------------------------------------|------------|---------------------------|-------------|--------------|--------------------------|-------|-----|-----|----|----|-----|-----|-----|----|-----|-----|
| MERIT-HF 1999 <sup>36</sup>         | DB, MC, PC | 14/ US, EU                | 18 months   | 1990<br>2001 | Metroproprlol<br>Placebo | ≤40%  | 28% | 78% | 64 | 0% | 41% | 55% | 4%  | NR | 66% | 49% |
| MERIT-HF (pilot) 1999 <sup>37</sup> | DB, MC, PC | NR                        | 6 months    | 42<br>19     | Metroproprlol<br>Placebo | ≤40%  | 27% | 75% | NR | 0% | 56% | 41% | 3%  | NR | NR  | NR  |
| MIC 2000 <sup>38</sup>              | DB, MC, PC | NR/<br>Germany,<br>Sweden | 6 months    | 26<br>26     | Metroproprlol<br>Placebo | <40%  | 28% | 71% | 54 | 0% | 58% | 42% | 0%  | NR | NR  | NR  |
| MOCHA 1996 <sup>39</sup>            | DB, MC, PC | NR/ US                    | 6 months    | 261<br>84    | Carvedilol<br>Placebo    | ≤ 35% | 23% | 76% | 60 | 0% | 53% | 60% | 2%  | 57 | 52% | NR  |
| PRECISE 1996 <sup>40</sup>          | DB, MC, PC | 31/ US                    | 6 months    | 133<br>145   | Carvedilol<br>Placebo    | ≤35%  | 22% | 73% | 60 | 0% | 40% | 56% | 4%  | NR | 52% | NR  |
| SYMPOXYDEX 2004 <sup>41</sup>       | DB, MC, PC | NR/ France                | 6 months    | 28<br>22     | Carvedilol<br>Placebo    | ≤40%  | 26% | 84% | 59 | 0% | 78% | 22% | 0%  | NR | 40% | NR  |
| Cohn 1997 <sup>42</sup>             | DB, MC, PC | 42 / US                   | 6 months    | 70<br>35     | Carvedilol<br>Placebo    | < 35% | 22% | 58% | 60 | 0% | 1%  | 86% | 13% | 49 | 45% | NR  |
| Colucci 1996 <sup>43</sup>          | DB, MC, PC | NR/ US                    | 12 months   | 232<br>134   | Carvedilol<br>Placebo    | ≤ 35% | 23% | 85% | 54 | 0% | 85% | 14% | 0%  | 48 | 41% | NR  |
| de Milliano 2002 <sup>44</sup>      | DB, MC, PC | Netherlands               | 8 months    | 43<br>11     | Metroproprlol<br>Placebo | <35%  | 25% | 67% | 65 | 0% | 54% | 46% | 0%  | NR | 56% | NR  |
| Dubach 2002 <sup>45</sup>           | DB, PC     | NR                        | 1 year      | 13<br>15     | Bisoprolol<br>Placebo    | <40%  | 26% | NR  | 58 | 0% | NR  | NR  | 0%  | NR | 57% | NR  |
| Krum 1995 <sup>46</sup>             | DB, PC     | NR/ US                    | 14 weeks    | 33<br>16     | Carvedilol<br>Placebo    | ≤ 35% | 16% | 78% | 55 | 0% | 27% | 63% | 10% | NR | 10% | NR  |
| Packer 1996 <sup>47</sup>           | DB, MC, PC | NR/ US                    | 6/12 months | 696<br>398   | Carvedilol<br>Placebo    | ≤ 35% | 23% | 77% | 58 | 0% | 53% | 44% | 3%  | NR | NR  | NR  |
| Palazzuoli 2005 <sup>48</sup>       | DB, PC     | Italy                     | 12 months   | 33<br>25     | Carvedilol<br>Placebo    | <40%  | 32% | 66% | 71 | 0% | 0%  | 57% | 43% | NR | 69% | NR  |

|                                |            |                    |                    |              |                                                                                                                                                                                                                  |      |     |     |    |     |      |     |     |    |     |     |
|--------------------------------|------------|--------------------|--------------------|--------------|------------------------------------------------------------------------------------------------------------------------------------------------------------------------------------------------------------------|------|-----|-----|----|-----|------|-----|-----|----|-----|-----|
| Palazzuoli 2005 <sup>49</sup>  | DB, PC     | Italy              | 12 months          | 32<br>27     | Carvedilol<br>Placebo                                                                                                                                                                                            | <40% | 32% | 64% | 71 | 0%  | 0%   | 58% | 42% | NR | 69% | NR  |
| Sturm 2000 <sup>50</sup>       | DB, SC, PC | 1/ Austria         | 2 years            | 51<br>49     | Atenolol +<br>Enalapril<br>Placebo +<br>Enalapril<br>(Candesartan,<br>Enalapril, or<br>Candesartan +<br>Enalapril) +<br>Metoprolol<br>(Candesartan,<br>Enalapril, or<br>Candesartan +<br>Enalapril) +<br>Placebo | ≤25% | 17% | 88% | 52 | 0%  | 78%  | 20% | 2%  | NR | 28% | NR  |
| RESOLVD 2000 <sup>51, 52</sup> | DB, MC, PC | 60/ NA, Italy      | 43 weeks           | 214<br>212   | Atenolol +<br>Enalapril<br>Placebo +<br>Enalapril<br>(Candesartan,<br>Enalapril, or<br>Candesartan +<br>Enalapril) +<br>Metoprolol<br>(Candesartan,<br>Enalapril, or<br>Candesartan +<br>Enalapril) +<br>Placebo | <40% | 28% | 82% | 61 | 7%  | 69%  | 23% | 1%  | NR | 69% | 64% |
| CHARM-added 2003 <sup>53</sup> | DB, MC, PC | 618/ NA, EU        | 3.5 years          | 1276<br>1272 | Candesartan<br>Placebo                                                                                                                                                                                           | ≤40% | 28% | 79% | 64 | 0%  | 24%  | 73% | 0%  | NR | 62% | 56% |
| AREA-IN CHF 2009 <sup>54</sup> | DB, MC, PC | 46/ Italy          | 12 months          | 231<br>236   | Canrenone<br>Placebo                                                                                                                                                                                             | ≤45% | 40% | 84% | 63 | 0%  | 100% | 0%  | 0%  | NR | 52% | NR  |
| EMPHASIS-HF 2011 <sup>55</sup> | DB, MC, PC | 278/ US, EU, AUS   | 3 years            | 1364<br>1373 | Eplerenone<br>Placebo                                                                                                                                                                                            | ≤30% | 26% | 78% | 69 | 0%  | 100% | 0%  | 0%  | 58 | 69% | 50% |
| Cicoira 2002 <sup>56</sup>     | OL         | Italy              | 12 months          | 54<br>52     | Spirolactone<br>Placebo                                                                                                                                                                                          | ≤45% | 33% | 87% | 62 | NR  | NR   | NR  | NR  | NR | 64% | NR  |
| Vizzardi 2014 <sup>57</sup>    | SB, SC, PC | 1/Italy            | 44 months (mean)   | 65<br>65     | Spirolactone<br>Placebo                                                                                                                                                                                          | <40% | 36% | NR  | 63 | 18% | 82%  | 0%  | 0%  | NR | NR  | NR  |
| PARADIGM-HF 2014 <sup>58</sup> | DB, MC     | 1043/ 46 countries | 27 months (median) | 4187<br>4212 | Valsartan/<br>sacubitril<br>Enalapril                                                                                                                                                                            | ≤40% | 29% | 78% | 64 | 5%  | 70%  | 24% | 1%  | NR | 60% | 43% |

Abbreviations: AUS = Australia; d = day(s); DB = double-blind; EU = Europe; heart failure = heart failure; MC = multicentre; mos = months; MI = myocardial infarction; NA = North America; NYHA = New York heart association; LVEF = left ventricular ejection fraction; mo = month(s); NR = not reported; OL = open label; PC = placebo controlled; SB = single blind; SC = single centre; US = United States; yrs= years; wk = week(s); yr = year(s)

**Supplementary Table 3: Characteristics of included interventions and concomitant therapies reported at baseline**

| Trial/Author year  | Intervention class (>50%) | Main Intervention | ACEI %      | ARB % | BB %        | MRA % | Digoxin % | Diuretics % |
|--------------------|---------------------------|-------------------|-------------|-------|-------------|-------|-----------|-------------|
| CASSIS 1995        | ACEI                      | Spirapril         | 5%          | NR    | NR          | NR    | 91%       | 96%         |
| CASSIS 1995        | ACEI                      | Spirapril         | 5%          | NR    | NR          | NR    | 91%       | 96%         |
| CASSIS 1995        | ACEI                      | Spirapril         | 5%          | NR    | NR          | NR    | 91%       | 96%         |
| CASSIS 1995        | ACEI                      | Enalapril         | 5%          | NR    | NR          | NR    | 91%       | 96%         |
| CASSIS 1995        | PLBO                      | Placebo           | 5%          | NR    | NR          | NR    | 91%       | 96%         |
| CONSENSUS 1987     | ACEI                      | Enalapril         | not allowed | NR    | 4%          | NR    | 92%       | 100%        |
| CONSENSUS 1987     | PLBO                      | Placebo           | not allowed | NR    | 2%          | NR    | 94%       | 100%        |
| FEST 1995          | ACEI                      | Fosinopril        | NR          | NR    | NR          | NR    | 61%       | 100%        |
| FEST 1995          | PLBO                      | Placebo           | NR          | NR    | NR          | NR    | 62%       | 100%        |
| MHFT 1991          | ACEI                      | Captopril         | NR          | NR    | 23%         | NR    | 59%       | 79%         |
| MHFT 1991          | PLBO                      | Placebo           | NR          | NR    | 23%         | NR    | 59%       | 79%         |
| SOLVD-prevent 1992 | ACEI                      | Enalapril         | not allowed | NR    | NR          | NR    | 12%       | 16%         |
| SOLVD-prevent 1992 | PLBO                      | Placebo           | not allowed | NR    | NR          | NR    | 13%       | 17%         |
| SOLVD-treat 1991   | ACEI                      | Enalapril         | not allowed | NR    | 8%          | NR    | 66%       | 86%         |
| SOLVD-treat 1991   | PLBO                      | Placebo           | not allowed | NR    | 7%          | NR    | 68%       | 85%         |
| Beller 1995        | ACEI                      | Lisinopril        | NR          | NR    | NR          | NR    | 94%       | 99%         |
| Beller 1995        | PLBO                      | Placebo           | NR          | NR    | NR          | NR    | 86%       | 97%         |
| Brown 1995         | ACEI                      | Fosinopril        | not allowed | NR    | not allowed | NR    | 53%       | 100%        |
| Brown 1995         | PLBO                      | Placebo           | not allowed | NR    | not allowed | NR    | 54%       | 100%        |
| Chalmers 1987      | ACEI                      | Lisinopril        | NR          | NR    | NR          | 10%   | 60%       | 55%         |
| Chalmers 1987      | PLBO                      | Placebo           | NR          | NR    | NR          | 14%   | 72%       | 49%         |
| Colfer 1992        | ACEI                      | Benazepril        | NR          | NR    | not allowed | NR    | 100%      | 100%        |
| Colfer 1992        | PLBO                      | Placebo           | NR          | NR    | not allowed | NR    | 100%      | 100%        |
| Goldstein 1988     | ACEI                      | Captopril         | NR          | NR    | NR          | NR    | 60%       | NR          |
| Goldstein 1988     | PLBO                      | Placebo           | NR          | NR    | NR          | NR    | 67%       | NR          |
| Lewis 1989         | ACEI                      | Lisinopril        | NR          | NR    | NR          | NR    | 100%      | 100%        |
| Lewis 1989         | PLBO                      | Placebo           | NR          | NR    | NR          | NR    | 100%      | 100%        |

|                 |      |             |             |             |             |    |       |      |
|-----------------|------|-------------|-------------|-------------|-------------|----|-------|------|
| Shettigar 1999  | ACEI | Fosinopril  | not allowed | NR          | not allowed | NR | 42%   | 100% |
| Shettigar 1999  | PLBO | Placebo     | not allowed | NR          | not allowed | NR | 47% % | 100% |
| Veldhuisen 1999 | ACEI | Imidapril   | NR          | NR          | not allowed | NR | 23%   | 34%  |
| Veldhuisen 1999 | ACEI | Imidapril   | NR          | NR          | not allowed | NR | 26%   | 25%  |
| Veldhuisen 1999 | ACEI | Imidapril   | NR          | NR          | not allowed | NR | 24%   | 30%  |
| Veldhuisen 1999 | PLBO | Placebo     | NR          | NR          | not allowed | NR | 19%   | 25%  |
| SPICE 2000      | ARB  | Candesartan | not allowed | not allowed | 22%         | NR | 60%   | NR   |
| SPICE 2000      | PLBO | Placebo     | not allowed | not allowed | 20%         | NR | 63%   | NR   |
| STRETCH 1999    | ARB  | Candesartan | not allowed | NR          | 1%          | NR | 40%   | 61%  |
| STRETCH 1999    | ARB  | Candesartan | not allowed | NR          | 1%          | NR | 43%   | 63%  |
| STRETCH 1999    | ARB  | Candesartan | not allowed | NR          | 0%          | NR | 42%   | 58%  |
| STRETCH 1999    | PLBO | Placebo     | not allowed | NR          | 1%          | NR | 39%   | 58%  |
| Mitrovic 2003   | ARB  | Candesartan | not allowed | not allowed | NR          | NR | 78%   | NR   |
| Mitrovic 2003   | ARB  | Candesartan | not allowed | not allowed | NR          | NR | 65%   | NR   |
| Mitrovic 2003   | ARB  | Candesartan | not allowed | not allowed | NR          | NR | 80%   | NR   |
| Mitrovic 2003   | ARB  | Candesartan | not allowed | not allowed | NR          | NR | 77%   | NR   |
| Mitrovic 2003   | PLBO | Placebo     | not allowed | not allowed | NR          | NR | 82%   | NR   |
| ELITE I 1997    | ARB  | Losartan    | not allowed | not allowed | 16%         | NR | 57%   | 74%  |
| ELITE I 1997    | ACEI | Captopril   | not allowed | not allowed | 17%         | NR | 56%   | 74%  |
| ELITE II 2000   | ARB  | Losartan    | not allowed | not allowed | 23%         | NR | 50%   | 77%  |
| ELITE II 2000   | ACEI | Captopril   | not allowed | not allowed | 21%         | NR | 50%   | 79%  |
| REPLACE 2001    | ACEI | Enalapril   | not allowed | not allowed | NR          | NR | 39%   | NR   |
| REPLACE 2001    | ARB  | Telmisartan | not allowed | not allowed | NR          | NR | 39%   | NR   |
| REPLACE 2001    | ARB  | Telmisartan | not allowed | not allowed | NR          | NR | 39%   | NR   |
| REPLACE 2001    | ARB  | Telmisartan | not allowed | not allowed | NR          | NR | 39%   | NR   |
| REPLACE 2001    | ARB  | Telmisartan | not allowed | not allowed | NR          | NR | 39%   | NR   |
| Dickstein 1995  | ARB  | Losartan    | NR          | NR          | 19%         | NR | 58%   | NR   |
| Dickstein 1995  | ARB  | Losartan    | NR          | NR          | 11%         | NR | 73%   | NR   |
| Dickstein 1995  | ACEI | Enalapril   | NR          | NR          | 7%          | NR | 59%   | NR   |
| Lang 1997       | ARB  | Losartan    | not allowed | NR          | 11%         | NR | 82%   | 100% |
| Lang 1997       | ARB  | Losartan    | not allowed | NR          | 3%          | NR | 85%   | 100% |
| Lang 1997       | ACEI | Enalapril   | not allowed | NR          | 8%          | NR | 87%   | 97%  |

|                                  |            |                           |             |             |             |             |      |      |
|----------------------------------|------------|---------------------------|-------------|-------------|-------------|-------------|------|------|
| CIBIS III 2008                   | BB         | Bisoprolol then Enalapril | not allowed | NR          | not allowed | 14%         | 33%  | NR   |
| CIBIS III 2008                   | ACEI       | Enalapril then Bisoprolol | not allowed | NR          | not allowed | 12%         | 31%  | NR   |
| CARMEN 2004                      | BB         | Carvedilol + placebo      | not allowed | NR          | not allowed | 15%         | 44%  | 67%  |
| CARMEN 2004                      | ACEI       | Enalapril + placebo       | not allowed | NR          | not allowed | 13%         | 44%  | 74%  |
| CARMEN 2004                      | ACEI + BB  | Carvedilol + enalapril    | not allowed | NR          | not allowed | 12%         | 47%  | 73%  |
| RALES 1999                       | ACEI + MRA | Spironolactone            | 95%         | NR          | 11%         | not allowed | 75%  | 95%  |
| RALES 1999                       | ACEI       | Placebo                   | 94%         | NR          | 10%         | not allowed | 72%  | 94%  |
| Val-HeFT 2001                    | ACEI + ARB | Valsartan                 | 93%         | not allowed | 35%         | NR          | 67%  | NR   |
| Val-HeFT 2001                    | ACEI       | Placebo                   | 93%         | not allowed | 35%         | NR          | 68%  | NR   |
| Hamroff 1999                     | ACEI + ARB | Losartan                  | 100%        | NR          | 6%          | NR          | 100% | 100% |
| Hamroff 1999                     | ACEI       | Placebo                   | 100%        | NR          | 6%          | NR          | 94%  | 100% |
| BEST 2001                        | ACEI + BB  | Bucindolol                | 91%         | 6%          | not allowed | 3%          | 93%  | NR   |
| BEST 2001                        | ACEI       | Placebo                   | 91%         | 7%          | not allowed | 4%          | 92%  | NR   |
| CELICARD 2000                    | ACEI + BB  | Celiprolol                | 80%         | NR          | not allowed | NR          | 51%  | NR   |
| CELICARD 2000                    | ACEI       | Placebo                   | 90%         | NR          | not allowed | NR          | 66%  | NR   |
| CIBIS I 1994                     | ACEI + BB  | Bisoprolol                | 89%         | NR          | NR          | NR          | 57%  | 100% |
| CIBIS I 1994                     | ACEI       | Placebo                   | 91%         | NR          | NR          | NR          | 56%  | 100% |
| CIBIS II 1999                    | ACEI + BB  | Bisoprolol                | 96%         | NR          | NR          | NR          | 53%  | 98%  |
| CIBIS II 1999                    | ACEI       | Placebo                   | 96%         | NR          | NR          | NR          | 51%  | 99%  |
| COPERNICUS 2001                  | ACEI + BB  | Carvedilol                | 97%*        | 97%*        | not allowed | 19%         | 67%  | NR   |
| COPERNICUS 2001                  | ACEI       | Placebo                   | 97%*        | 97%*        | not allowed | 20%         | 65%  | NR   |
| ENECA 2005                       | ACEI + BB  | Nebivolol                 | 91%         | 5%          | not allowed | NR          | 60%  | NR   |
| ENECA 2005                       | ACEI       | Placebo                   | 92%         | 7%          | not allowed | NR          | 53%  | NR   |
| MERIT-heart failure 1999         | ACEI + BB  | Metoprolol                | 89%         | 7%          | not allowed | 7%          | 63%  | 91%  |
| MERIT-heart failure 1999         | ACEI       | Placebo                   | 90%         | 6%          | not allowed | 8%          | 64%  | 90%  |
| MERIT-heart failure (pilot) 1999 | ACEI + BB  | Metoprolol                | 95%         | NR          | NR          | NR          | 91%  | NR   |
| MERIT-heart failure (pilot) 1999 | ACEI       | Placebo                   | 89%         | NR          | NR          | NR          | 90%  | NR   |
| MIC 2000                         | ACEI + BB  | Metoprolol                | 92%         | NR          | not allowed | NR          | 51%  | NR   |
| MIC 2000                         | ACEI       | Placebo                   | 91%         | NR          | not allowed | NR          | 52%  | NR   |
| MOCHA 1996                       | ACEI + BB  | Carvedilol (low-dose)     | 93%         | NR          | not allowed | NR          | 99%  | 98%  |
| MOCHA 1996                       | ACEI + BB  | Carvedilol (medium-dose)  | 99%         | NR          | not allowed | NR          | 88%  | 96%  |

|                        |                 |                                                                   |                 |                |             |     |     |      |
|------------------------|-----------------|-------------------------------------------------------------------|-----------------|----------------|-------------|-----|-----|------|
| MOCHA 1996             | ACEI + BB       | Carvedilol (high-dose)                                            | 89%             | NR             | not allowed | NR  | 90% | 93%  |
| MOCHA 1996             | ACEI            | Placebo                                                           | 94%             | NR             | not allowed | NR  | 93% | 93%  |
| PRECISE 1996           | ACEI + BB       | Carvedilol                                                        | 96%             | NR             | not allowed | NR  | 91% | 98%  |
| PRECISE 1996           | ACEI            | Placebo                                                           | 97%             | NR             | not allowed | NR  | 88% | 99%  |
| SYMPOXYDEX 2004        | ACEI + BB       | Carvedilol                                                        | 96%             | NR             | not allowed | NR  | NR  | 100% |
| SYMPOXYDEX 2004        | ACEI            | Placebo                                                           | 96%             | NR             | not allowed | NR  | NR  | 100% |
| Cohn 1997              | ACEI + BB       | Carvedilol                                                        | 94%             | NR             | NR          | NR  | 90% | 97%  |
| Cohn 1997              | ACEI            | Placebo                                                           | 91%             | NR             | NR          | NR  | 89% | 100% |
| Colucci 1996           | ACEI + BB       | Carvedilol                                                        | 98%             | NR             | not allowed | NR  | 89% | NR   |
| Colucci 1996           | ACEI            | Placebo                                                           | 98%             | NR             | not allowed | NR  | 89% | NR   |
| de Milliano 2002       | ACEI + BB       | Metoprolol                                                        | 93%             | NR             | not allowed | NR  | 28% | NR   |
| de Milliano 2002       | ACEI            | Placebo                                                           | 91%             | NR             | not allowed | NR  | 36% | NR   |
| Dubach 2002            | ACEI + BB       | Bisoprolol                                                        | 100%            | NR             | not allowed | NR  | 5%  | NR   |
| Dubach 2002            | ACEI            | Placebo                                                           | 100%            | NR             | not allowed | NR  | 9%  | NR   |
| Krum 1995              | ACEI + BB       | Carvedilol                                                        | 90%             | NR             | NR          | NR  | NR  | NR   |
| Krum 1995              | ACEI            | Placebo                                                           | 90%             | NR             | NR          | NR  | NR  | NR   |
| Packer 1996            | ACEI + BB       | Carvedilol                                                        | 95%             | NR             | not allowed | NR  | 91% | 95%  |
| Packer 1996            | ACEI            | Placebo                                                           | 95%             | NR             | not allowed | NR  | 90% | 95%  |
| Palazzuoli 2005        | ACEI + BB       | Carvedilol                                                        | 100%            | NR             | not allowed | NR  | NR  | NR   |
| Palazzuoli 2005        | ACEI            | Placebo                                                           | 100%            | NR             | not allowed | NR  | NR  | NR   |
| Palazzuoli 2005        | ACEI + BB       | Carvedilol                                                        | 100%            | NR             | not allowed | NR  | NR  | NR   |
| Palazzuoli 2005        | ACEI            | Placebo                                                           | 100%            | NR             | not allowed | NR  | NR  | NR   |
| Sturm 2000             | ACEI + BB       | Atenolol + enalapril                                              | 100%            | NR             | not allowed | NR  | 51% | NR   |
| Sturm 2000             | ACEI            | Placebo + enalapril                                               | 100%            | NR             | not allowed | NR  | 49% | NR   |
| HEAVEN 2002            | ARB + BB        | Valsartan                                                         | not allowed     | not allowed    | 52%         | NR  | 26% | NR   |
| HEAVEN 2002            | ACEI + BB       | Enalapril                                                         | not allowed     | not allowed    | 56%         | NR  | 32% | NR   |
| CHARM-alternative 2003 | ARB + BB        | Candesartan                                                       | not allowed     | not allowed    | 55%         | 25% | 60% | NR   |
| CHARM-alternative 2003 | BB              | Placebo                                                           | not allowed     | not allowed    | 55%         | 23% | 63% | NR   |
| RESOLVD 2000           | ACEI + ARB + BB | (Candesartan, enalapril, or candesartan + enalapril) + metoprolol | ACEI alone: 14% | ARB alone: 45% | not allowed | NR  | 65% | NR   |
| RESOLVD 2000           | ACEI + ARB      | (Candesartan, enalapril, or candesartan + enalapril) + placebo    | ACEI + ARB: 41% | ARB alone: 40% | not allowed | NR  | 69% | NR   |



|                             |                 |                                         |                        |             |             |             |     |     |
|-----------------------------|-----------------|-----------------------------------------|------------------------|-------------|-------------|-------------|-----|-----|
| RESOLVD 2003                | ARB + BB        | (Candesartan or enalapril) + metoprolol | ACEI + ARB: 41%<br>23% | 77%         | not allowed | NR          | 68% | 82% |
| RESOLVD 2003                | ACEI + ARB + BB | (Candesartan + enalapril) + metoprolol  | not allowed            | not allowed | not allowed | NR          | 62% | 83% |
| RESOLVD 2003                | ARB             | (Candesartan or enalapril) + placebo    | 33%                    | 67%         | not allowed | NR          | 74% | 85% |
| RESOLVD 2003                | ACEI + ARB      | (Candesartan + enalapril) + placebo     | not allowed            | not allowed | not allowed | NR          | 70% | 83% |
| CHARM-added 2003            | ACEI + ARB + BB | Candesartan                             | 100%                   | not allowed | 55%         | 17%         | 58% | NR  |
| CHARM-added 2003            | ACEI + BB       | Placebo                                 | 100%                   | not allowed | 56%         | 17%         | 59% | NR  |
| AREA-IN CHF 2009            | ACEI + BB + MRA | Canrenone                               | 85%                    | 12%         | 81%         | not allowed | 24% | NR  |
| AREA-IN CHF 2009            | ACEI + BB       | Placebo                                 | 75%                    | 24%         | 78%         | not allowed | 27% | NR  |
| EMPHASIS-heart failure 2011 | ACEI + BB + MRA | Eplerenone                              | 78%                    | 19%         | 87%         | not allowed | 27% | 84% |
| EMPHASIS-heart failure 2011 | ACEI + BB       | Placebo                                 | 77%                    | 19%         | 87%         | not allowed | 28% | 86% |
| Cicoira 2002                | ACEI + BB + MRA | Spirolactone                            | 100%                   | NR          | 72%         | not allowed | NR  | NR  |
| Cicoira 2002                | ACEI + BB       | Placebo                                 | 100%                   | NR          | 65%         | not allowed | NR  | NR  |
| Vizzardi 2014               | ACEI + BB + MRA | Spirolactone                            | 100%*                  | 100%*       | 97%         | NR          | NR  | 75% |
| Vizzardi 2014               | ACEI + BB       | Placebo                                 | 100%*                  | 100%*       | 98%         | NR          | NR  | 86% |
| PARADIGM-heart failure 2014 | ARNI + BB + MRA | Sacubitril/valsartan                    | not allowed            | NR          | 93%         | 54%         | 29% | 80% |
| PARADIGM-heart failure 2014 | ACEI + BB + MRA | Enalapril                               | not allowed            | NR          | 93%         | 57%         | 31% | 80% |

\* data presented for ACEI/ARB

Abbreviations: ACEI = angiotensin-converting-enzyme inhibitor; ARB = angiotensin-II receptor antagonist; ARNI = angiotensin receptor-neprilysin inhibitor; BB = beta blocker; MRA = mineralocorticoid receptor antagonist; NR = not reported; PLBO = placebo

**Supplementary Table 4: Proportion of patients taking concomitant ACEI and ARB in RCTs that allow concomitant use of ACEI or ARB**

| <b>Criteria for ACEI or ARB</b>     | <b>n studies</b> | <b>% of studies</b> |
|-------------------------------------|------------------|---------------------|
| ACEI or ARB allowed                 | 9                | 100%                |
| $\geq 90\%$ patients taking ACEI    | 3/9              | 33%                 |
| $\geq 75\%$ patients taking ACEI    | 6/9              | 67%                 |
| Only present pooled % (ACEI or ARB) | 2/9              | 22%                 |
| Treatment classification unclear*   | 1/9              | 11%                 |

\* RESOLVD trial <sup>51,52</sup>

Abbreviations: ACEI = angiotensin-converting-enzyme inhibitor; ARB = angiotensin-II receptor antagonist

**Supplementary Table 5: Treatment doses and schedules by molecule**

| <b>Intervention class (&gt;50%)</b> | <b>Trial/Author year</b> | <b>Main Intervention</b> | <b>Target dosage</b> | <b>Frequency</b> | <b>Target daily dosage</b> | <b>Treatment duration</b>                                                           |
|-------------------------------------|--------------------------|--------------------------|----------------------|------------------|----------------------------|-------------------------------------------------------------------------------------|
| ACEI                                | Colfer 1992              | Benazepril               | 20mg                 | OD               | 20mg                       | 12 weeks (titration first 8 weeks)                                                  |
| ACEI                                | MHFT 1991                | Captopril                | 25mg                 | BID              | 40mg                       | Median: 2.7 years                                                                   |
| ACEI                                | ELITE I 1997             | Captopril                | 50mg                 | TID              | 150mg                      | 48 weeks (uptitration every 7 days)                                                 |
| ACEI                                | ELITE II 2000            | Captopril                | 50mg                 | TID              | 150mg                      | 700 days                                                                            |
| ACEI                                | Anonymous 1988           | Captopril                | 50mg                 | TID              | 150mg                      | 24 weeks (uptitrated from 25mg/day if tolerated)                                    |
| ACEI                                | Dickstein 1995           | Enalapril                | 10mg                 | BID              | 20mg                       | 8 weeks                                                                             |
| ACEI                                | REPLACE 2001             | Enalapril                | 10mg                 | BID              | 20mg                       | 12 weeks                                                                            |
| ACEI                                | CARMEN 2004              | Enalapril                | 10mg                 | BID              | 20mg                       | 18 months (plus upward titration and downward titration, undefined lengths of time) |
| ACEI                                | CASSIS 1995              | Enalapril                | 10mg                 | OD               | 10mg                       | 12 weeks                                                                            |
| ACEI                                | SOLVD-treat 1991         | Enalapril                | 10mg                 | BID              | 20mg                       | 48 months                                                                           |
| ACEI                                | SOLVD-prevent 1992       | Enalapril                | 10mg                 | BID              | 20mg                       | 37.4 months (mean)                                                                  |
| ACEI                                | CIBIS III 2008           | Enalapril                | 10mg                 | BID              | 20mg/10mg                  | 6 months                                                                            |
| ACEI                                | CONSENSUS 1987           | Enalapril                | 10mg-20mg            | BID              | 20mg-40mg                  | 52 weeks                                                                            |
| ACEI                                | Lang 1997                | Enalapril                | 20mg                 | BID              | 40mg                       | 12 weeks                                                                            |
| ACEI                                | Sturm 2000               | Enalapril                | 40mg                 | OD               | 40mg                       | 2 years (includes titration)                                                        |
| ACEI                                | Brown 1995               | Fosinopril               | 20mg                 | OD               | 20mg                       | 24 weeks                                                                            |
| ACEI                                | FEST 1995                | Fosinopril               | 40mg                 | OD               | 40mg                       | 12 weeks                                                                            |
| ACEI                                | Shettigar 1999           | Fosinopril               | 40mg                 | OD               | 40mg                       | 12 weeks (uptitration over first 4-weeks)                                           |
| ACEI                                | Veldhuisen 1999*         | Imidapril                | 2.5mg                | OD               | 2.5mg                      | 12 weeks                                                                            |
| ACEI                                | Veldhuisen 1999*         | Imidapril                | 5mg                  | OD               | 5mg                        | 12 weeks                                                                            |
| ACEI                                | Veldhuisen 1999          | Imidapril                | 10mg                 | OD               | 10mg                       | 12 weeks                                                                            |
| ACEI                                | Beller 1995              | Lisinopril               | 5mg-20mg             | OD               | 5mg-20mg                   | 12 weeks                                                                            |
| ACEI                                | Chalmers 1987            | Lisinopril               | 5mg-20mg             | OD               | 5mg-20mg                   | 12 weeks                                                                            |

|      |                                  |            |        |    |        |                                                                                         |
|------|----------------------------------|------------|--------|----|--------|-----------------------------------------------------------------------------------------|
| ACEI | Lewis 1989                       | Lisinopril | 5-20mg | OD | 5-20mg | 12 weeks                                                                                |
| ACEI | CASSIS 1995*                     | Spirapril  | 1.5mg  | OD | 1.5mg  | 12 weeks                                                                                |
| ACEI | CASSIS 1995*                     | Spirapril  | 3mg    | OD | 3mg    | 12 weeks                                                                                |
| ACEI | CASSIS 1995                      | Spirapril  | 6mg    | OD | 6mg    | 12 weeks                                                                                |
| ACEI | MERIT-heart failure 1999         | Placebo    | NA     | NA | NA     | 18 months (including 6-8 week titration)                                                |
| ACEI | MOCHA 1996                       | Placebo    | NA     | NA | NA     | 6 months (plus 2-4 week titration)                                                      |
| ACEI | SYMPOXYDEX 2004                  | Placebo    | NA     | NA | NA     | 6 months (including 6 weeks titration)                                                  |
| ACEI | Cohn 1997                        | Placebo    | NA     | NA | NA     | 6 months (plus 4 week titration)                                                        |
| ACEI | Val-HeFT 2001                    | Placebo    | NA     | NA | NA     | 38 months (including 4 weeks titration)                                                 |
| ACEI | de Milliano 2002                 | Placebo    | NA     | NA | NA     | 6 months (plus 10 wks titration)                                                        |
| ACEI | Dubach 2002                      | Placebo    | NA     | NA | NA     | 12 months (titration first month)                                                       |
| ACEI | ENECA 2005                       | Placebo    | NA     | NA | NA     | 48 weeks (includes 6 week titration period)                                             |
| ACEI | BEST 2001                        | Placebo    | NA     | NA | NA     | 42 months (titration first 6 weeks)                                                     |
| ACEI | MIC 2000                         | Placebo    | NA     | NA | NA     | 6 months (including 6 week titration)                                                   |
| ACEI | MERIT-heart failure (pilot) 1999 | Placebo    | NA     | NA | NA     | 26 weeks (titration first 8 weeks)                                                      |
| ACEI | Hamroff 1999                     | Placebo    | NA     | NA | NA     | 6 months                                                                                |
| ACEI | CIBIS I 1994                     | Placebo    | NA     | NA | NA     | 2 years (mean duration 1.9)                                                             |
| ACEI | CIBIS II 1999                    | Placebo    | NA     | NA | NA     | mean duration: 1.3 years (titration weeks 1-5)                                          |
| ACEI | PRECISE 1996                     | Placebo    | NA     | NA | NA     | 6 months                                                                                |
| ACEI | Packer 1996                      | Placebo    | NA     | NA | NA     | 6 months (plus 2-10 week titration (mild heart failure protocol; 12 months + titration) |
| ACEI | Colucci 1996                     | Placebo    | NA     | NA | NA     | 52 weeks (plus uptitration 2-6 weeks)                                                   |
| ACEI | Krum 1995                        | Placebo    | NA     | NA | NA     | 14 weeks (titration in first week)                                                      |
| ACEI | COPERNICUS 2001                  | Placebo    | NA     | NA | NA     | 28.7 months (includes approximately 8 week titration period)                            |
| ACEI | Palazzuoli 2005                  | Placebo    | NA     | NA | NA     | 12 months (titration first 7 weeks)                                                     |
| ACEI | Palazzuoli 2005                  | Placebo    | NA     | NA | NA     | 12 months (titration first 7 weeks)                                                     |
| ACEI | RALES 1999                       | Placebo    | NA     | NA | NA     | 24 months                                                                               |

|            |                        |                                     |                       |     |                        |                                                                                                            |
|------------|------------------------|-------------------------------------|-----------------------|-----|------------------------|------------------------------------------------------------------------------------------------------------|
| ACEI       | CELICARD 2000          | Placebo                             | NA                    | NA  | NA                     | 1 year (including 1 month titration period)                                                                |
| BB         | CIBIS III 2008         | Bisoprolol                          | 10mg                  | OD  | 10mg                   | 26 weeks (including 10 week titration)                                                                     |
| BB         | CARMEN 2004            | Carvedilol                          | 25mg or 50mg if >85kg | BID | 50mg or 100mg if >85kg | 18 months (plus upward titration and downward titration, undefined lengths of time)                        |
| BB         | CHARM-alternative 2003 | Placebo                             | NA                    | NA  | NA                     | 33.7 months (median follow-up, plus 6 weeks titration period)                                              |
| ARB        | SPICE 2000             | Candesartan                         | 16mg                  | OD  | 16mg                   | 12 weeks (including 4 weeks titration)                                                                     |
| ARB        | STRETCH1999*           | Candesartan                         | 4mg                   | OD  | 4mg                    | 12 weeks                                                                                                   |
| ARB        | STRETCH1999*           | Candesartan                         | 8mg                   | OD  | 8mg                    | 12 weeks                                                                                                   |
| ARB        | STRETCH1999            | Candesartan                         | 16mg                  | OD  | 16mg                   | 12 weeks                                                                                                   |
| ARB        | Lang 1997              | Losartan*                           | 25mg                  | OD  | 25mg                   | 12 weeks                                                                                                   |
| ARB        | Lang 1997              | Losartan                            | 50mg                  | OD  | 50mg                   | 12 weeks                                                                                                   |
| ARB        | Mitrovic 2003*         | Candesartan                         | 2mg                   | OD  | 2mg                    | 12 weeks (titration first 3 weeks)                                                                         |
| ARB        | Mitrovic 2003*         | Candesartan                         | 4mg                   | OD  | 4mg                    | 12 weeks (titration first 3 weeks)                                                                         |
| ARB        | Mitrovic 2003*         | Candesartan                         | 8mg                   | OD  | 8mg                    | 12 weeks (titration first 3 weeks)                                                                         |
| ARB        | Mitrovic 2003          | Candesartan                         | 16mg                  | OD  | 16mg                   | 12 weeks (titration first 3 weeks)                                                                         |
| ARB        | Dickstein 1995*        | Losartan                            | 25mg                  | OD  | 25mg                   | 8 weeks                                                                                                    |
| ARB        | Dickstein 1995         | Losartan                            | 50mg                  | OD  | 50mg                   | 8 weeks                                                                                                    |
| ARB        | ELITE I 1997           | Losartan                            | 50mg                  | OD  | 50mg                   | 48 weeks (uptitration every 7 days)                                                                        |
| ARB        | ELITE II 2000          | Losartan                            | 50mg                  | OD  | 50mg                   | 700 days                                                                                                   |
| ARB        | REPLACE 2001*          | Telmisartan                         | 10mg                  | OD  | 10mg                   | 12 weeks                                                                                                   |
| ARB        | REPLACE 2001*          | Telmisartan                         | 20mg                  | OD  | 20mg                   | 12 weeks                                                                                                   |
| ARB        | REPLACE 2001*          | Telmisartan                         | 40mg                  | OD  | 40mg                   | 12 weeks                                                                                                   |
| ARB        | REPLACE 2001           | Telmisartan                         | 80mg                  | OD  | 80mg                   | 12 weeks                                                                                                   |
| ACEI + ARB | RESOLVD 2003           | (Candesartan + enalapril) + placebo | NA                    | NA  | NA                     | 19 weeks without placebo (including mean titration 93 days), placebo received for 24weeks (43 weeks total) |
| ACEI + ARB | Hamroff 1999           | Losartan                            | 50mg                  | OD  | 50mg                   | 6 months                                                                                                   |
| ACEI + ARB | Val-HeFT 2001          | Valsartan                           | 160mg                 | BID | 320mg                  | 38 months (including 4 weeks titration)                                                                    |

|           |                 |                          |                                  |       |                             |                                                                                         |
|-----------|-----------------|--------------------------|----------------------------------|-------|-----------------------------|-----------------------------------------------------------------------------------------|
| ACEI + BB | Sturm 2000      | Atenolol + enalapril     | 50mg-100mg/40mg                  | daily | 50mg-100mg/40mg             | 2 years (includes titration)                                                            |
| ACEI + BB | Dubach 2002     | Bisoprolol               | 10mg                             | daily | 10mg                        | 12 months (titration first month)                                                       |
| ACEI + BB | CIBIS I 1994    | Bisoprolol               | 5mg                              | OD    | 5mg                         | 2 years (mean duration 1.9)                                                             |
| ACEI + BB | CIBIS II 1999   | Bisoprolol               | 2.5-10mg                         | OD    | 2.5-10mg                    | mean duration: 1.3 years (titration weeks 1-5)                                          |
| ACEI + BB | BEST 2001       | Bucindolol               | 50mg if <75kg;<br>100mg if >75kg | BID   | 100mg or 200mg              | 42 months (titration first 6 weeks)                                                     |
| ACEI + BB | SYMPOXYDEX 2004 | Carvedilol               | 25mg                             | BID   | 50mg                        | 6 months (including 6 weeks titration)                                                  |
| ACEI + BB | Cohn 1997       | Carvedilol               | 25mg                             | BID   | 50mg                        | 6 months (plus 4 week titration)                                                        |
| ACEI + BB | PRECISE 1996    | Carvedilol               | 25mg                             | BID   | 50mg                        | 6 months                                                                                |
| ACEI + BB | Krum 1995       | Carvedilol               | 25mg                             | BID   | 50mg                        | 14 weeks (titration in first week)                                                      |
| ACEI + BB | Packer 1996     | Carvedilol               | 25-50mg                          | BID   | 50mg-100mg                  | 6 months (plus 2-10 week titration (mild heart failure protocol; 12 months + titration) |
| ACEI + BB | Colucci 1996    | Carvedilol               | 25-50mg                          | BID   | 50-100mg                    | 52 weeks (plus uptitration 2-6 weeks)                                                   |
| ACEI + BB | COPERNICUS 2001 | Carvedilol               | 25mg                             | BID   | 50mg                        | 28.7 months (includes approximately 8 week titration period)                            |
| ACEI + BB | Palazzuoli 2005 | Carvedilol               | 50mg                             | daily | 50mg                        | 12 months (titration first 7 weeks)                                                     |
| ACEI + BB | Palazzuoli 2005 | Carvedilol               | 50mg                             | daily | 50mg                        | 12 months (titration first 7 weeks)                                                     |
| ACEI + BB | MOCHA 1996*     | Carvedilol (low-dose)    | 6.25mg                           | BID   | 12.5mg                      | 6 months (plus 2-4 week titration)                                                      |
| ACEI + BB | MOCHA 1996*     | Carvedilol (medium-dose) | 12.5mg                           | BID   | 25mg                        | 6 months (plus 2-4 week titration)                                                      |
| ACEI + BB | MOCHA 1996      | Carvedilol (high-dose)   | 25mg                             | BID   | 50mg                        | 6 months (plus 2-4 week titration)                                                      |
| ACEI + BB | CARMEN 2004     | Carvedilol + enalapril   | 25mg or 50mg if >85kg/10mg       | BID   | 50mg or 100mg if >85kg/20mg | 18 months (plus upward titration and downward titration, undefined lengths of time)     |
| ACEI + BB | CELICARD 2000   | Celiprolol               | 100mg                            | OD    | 100mg                       | 1 year (including 1 month titration period)                                             |

|                 |                                  |                                        |                  |       |                     |                                                                                                                  |
|-----------------|----------------------------------|----------------------------------------|------------------|-------|---------------------|------------------------------------------------------------------------------------------------------------------|
| ACEI + BB       | MERIT-heart failure 1999         | Metoprolol                             | 200mg            | daily | 200mg               | 18 months (including 6-8 week titration)                                                                         |
| ACEI + BB       | MERIT-heart failure (pilot) 1999 | Metoprolol                             | 150mg            | o.d.  | 150 mg              | 26 weeks (titration first 8 weeks)                                                                               |
| ACEI + BB       | de Milliano 2002                 | Metoprolol                             | 50, 100 or 150mg | daily | 50, 100 or 150mg    | 6 months (plus 10 wks titration)                                                                                 |
| ACEI + BB       | MIC 2000                         | Metoprolol                             | NR               | NR    | 135mg (mean)        | 6 months (including 6 week titration)                                                                            |
| ACEI + BB       | ENECA 2005                       | Nebivolol                              | 10mg             | daily | 10mg                | 48 weeks (includes 6 week titration period)                                                                      |
| ACEI + BB       | HEAVEN 2002                      | Enalapril                              | 10mg             | BID   | 20mg                | 12 weeks (including titration)                                                                                   |
| ACEI + BB       | AREA-IN CHF 2009                 | Placebo                                | NA               | NA    | NA                  | 12 months                                                                                                        |
| ACEI + BB       | Cicoira 2002                     | Placebo                                | NA               | NA    | NA                  | 12 months (includes titration)                                                                                   |
| ACEI + BB       | Vizzarda 2014                    | Placebo                                | 25mg             | OD    | 25mg                | 44 months (mean)                                                                                                 |
| ACEI + BB       | CHARM-added 2003                 | Placebo                                | NA               | NA    | NA                  | 41 months (median follow-up, plus 6 weeks titration period)                                                      |
| ACEI + BB       | EMPHASIS-heart failure 2011      | Placebo                                | NA               | NA    | NA                  | 3 years                                                                                                          |
| ARB + BB        | HEAVEN 2002                      | Valsartan                              | 160mg            | OD    | 160mg               | 12 weeks (including titration)                                                                                   |
| ARB + BB        | CHARM-alternative 2003           | Candesartan                            | 32mg             | OD    | 32mg                | 33.7 months (median follow-up, plus 6 weeks titration period)                                                    |
| ACEI + MRA      | RALES 1999                       | Spironolactone                         | 25-50mg          | OD    | 25-50mg (mean 30mg) | 24 months                                                                                                        |
| ACEI + ARB + BB | RESOLVD 2003                     | (Candesartan + enalapril) + metoprolol | 200mg            | daily | 200mg               | 19 weeks without metoprolol (including mean titration 93 days), metoprolol received for 24weeks (43 weeks total) |
| ACEI + ARB + BB | CHARM-added 2003                 | Candesartan                            | 32mg             | OD    | 32mg                | 41 months (median follow-up, plus 6 weeks titration period)                                                      |
| ACEI + BB + MRA | AREA-IN CHF 2009                 | Canrenone                              | 50mg             | OD    | 50mg                | 12 months                                                                                                        |
| ACEI + BB + MRA | EMPHASIS-heart failure 2011      | Eplerenone                             | 50mg             | OD    | 50mg                | 3 years                                                                                                          |
| ACEI + BB + MRA | PARADIGM-heart failure 2014      | Enalapril                              | 10mg             | BID   | 20mg                | 27 months (median)                                                                                               |
| ACEI + BB + MRA | Cicoira 2002                     | Spironolactone                         | 50mg             | OD    | 50mg                | 12 months (includes titration)                                                                                   |

|                 |                             |                      |            |        |            |                                                  |
|-----------------|-----------------------------|----------------------|------------|--------|------------|--------------------------------------------------|
| ACEI + BB + MRA | Vizzard 2014                | Spirinolactone       | 25mg-100mg | OD-QID | 25mg-400mg | 44 months (mean)                                 |
| ARNI + BB + MRA | PARADIGM-heart failure 2014 | Sacubitril/valsartan | 200mg      | BID    | 400mg      | 27 months (median)                               |
| PLBO            | Beller 1995                 | Placebo              | 5mg-20mg   | OD     | 5mg-20mg   | 12 weeks                                         |
| PLBO            | Brown 1995                  | Placebo              | NA         | NA     | NA         | 24 weeks                                         |
| PLBO            | Chalmers 1987               | Placebo              | 5mg-20mg   | OD     | 5mg-20mg   | 12 weeks                                         |
| PLBO            | STRETCH 1999                | Placebo              | NA         | NA     | NA         | 12 weeks                                         |
| PLBO            | Anonymous 1988              | Placebo              | NA         | NA     | NA         | 24 weeks (uptitrated from 25mg/day if tolerated) |
| PLBO            | Colfer 1992                 | Placebo              | NA         | NA     | NA         | 12 weeks (titration first 8 weeks)               |
| PLBO            | FEST 1995                   | Placebo              | NA         | NA     | NA         | 12 weeks                                         |
| PLBO            | SPICE 2000                  | Placebo              | NA         | NA     | NA         | 12 weeks (including 4 weeks titration)           |
| PLBO            | MHFT 1991                   | Placebo              | NA         | NA     | NA         | Median: 2.7 years                                |
| PLBO            | Lewis 1989                  | Placebo              | NA         | NA     | NA         | 12 weeks                                         |
| PLBO            | Mitrovic 2003               | Placebo              | NA         | NA     | NA         | 12 weeks (titration first 3 weeks)               |
| PLBO            | Shettigar 1999              | Placebo              | NA         | NA     | NA         | 12 weeks (uptitration over first 4-weeks)        |
| PLBO            | CONSENSUS 1987              | Placebo              | NA         | NA     | NA         | 52 weeks                                         |
| PLBO            | Veldhuisen 1999             | Placebo              | NA         | NA     | NA         | 12 weeks                                         |
| PLBO            | CASSIS 1995                 | Placebo              | NA         | NA     | NA         | 12 weeks                                         |
| PLBO            | SOLVD-treat 1991            | Placebo              | NA         | NA     | NA         | 48 months                                        |
| PLBO            | SOLVD-prevent 1992          | Placebo              | NA         | NA     | NA         | 37.4 months (mean)                               |

\* Arm excluded from analysis (more common dose available)

Abbreviations: ACEI = angiotensin-converting-enzyme inhibitor; ARB = angiotensin-II receptor antagonist; ARNI = angiotensin receptor-neprilysin inhibitor;

BB = beta blocker; BID = twice daily; mg = milligrams; MRA = mineralocorticoid receptor antagonist; NA = not applicable; NR = not reported; OD = once

daily; PLBO = placebo; QID = four times daily; TID = three times daily



Supplementary Figure 1: Quality assessment results A) Summary by domain, B) Summary by RCT

A)

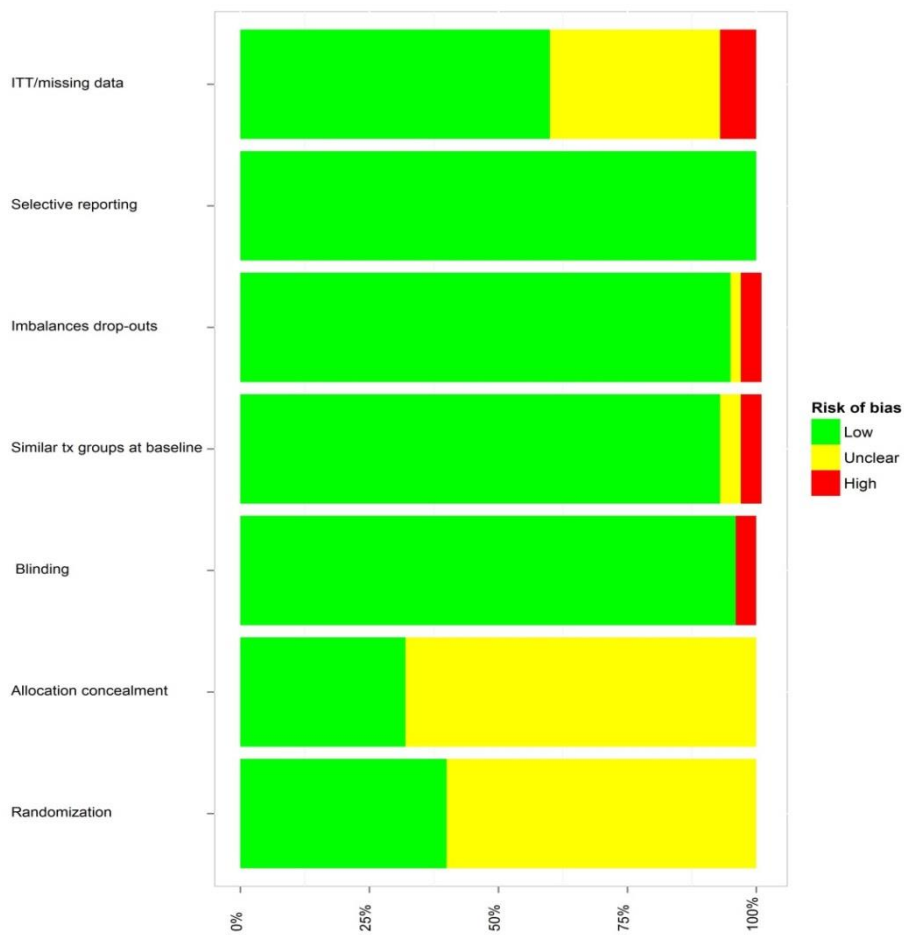

B)

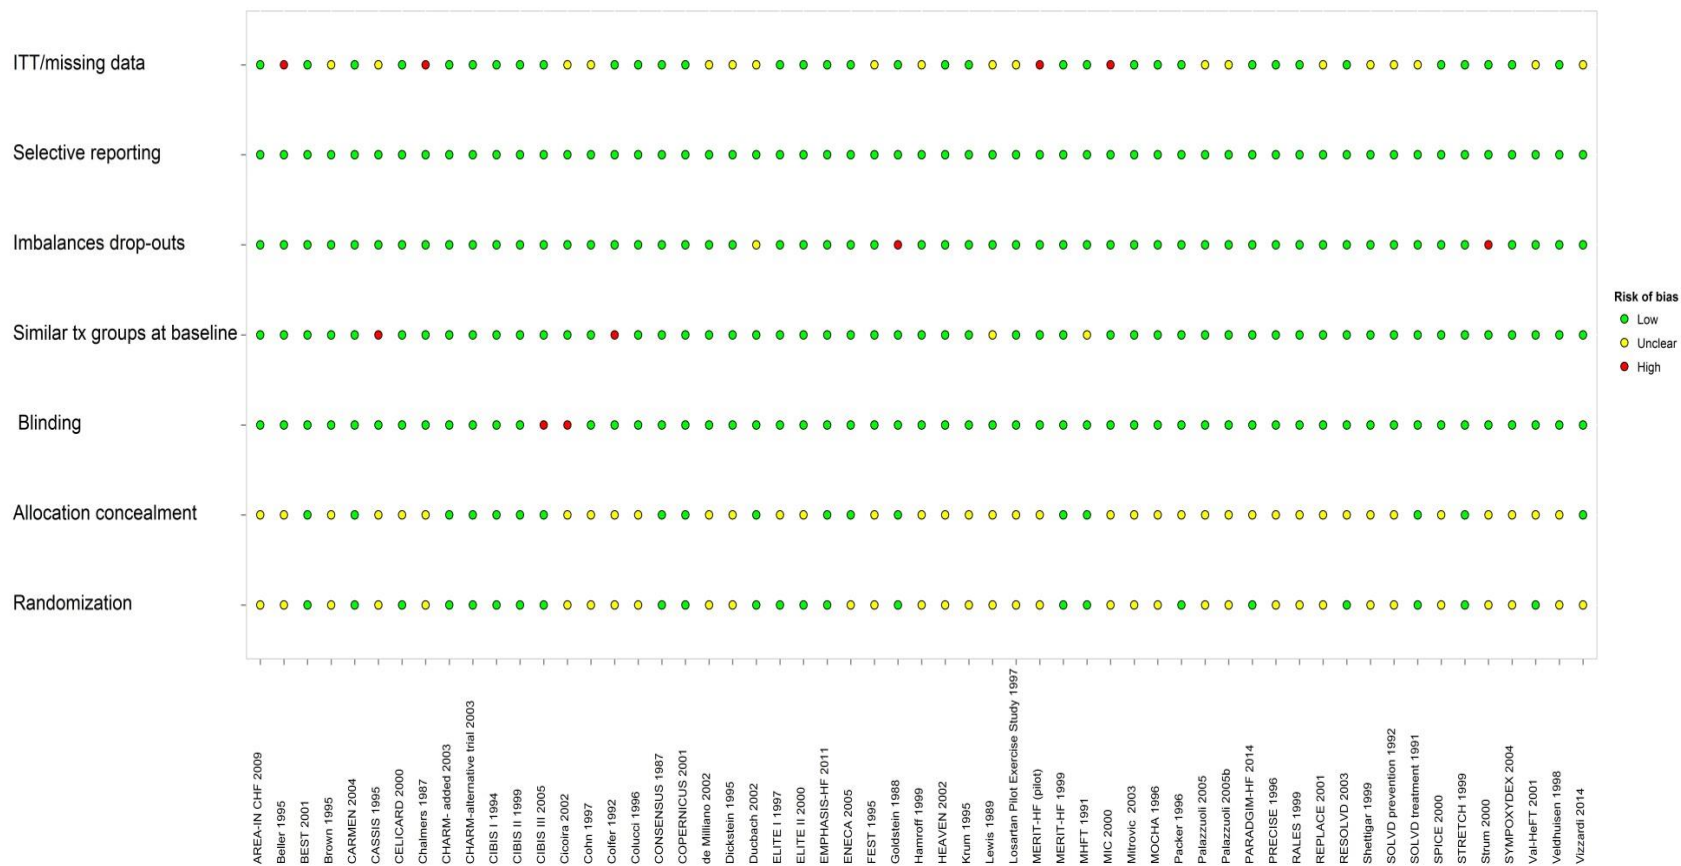

**Supplementary Figure 2: Rates per patient year sorted by publication year and presented by treatment arm for A) Placebo, B) ACEI, C) all other treatment arms**

**A)**

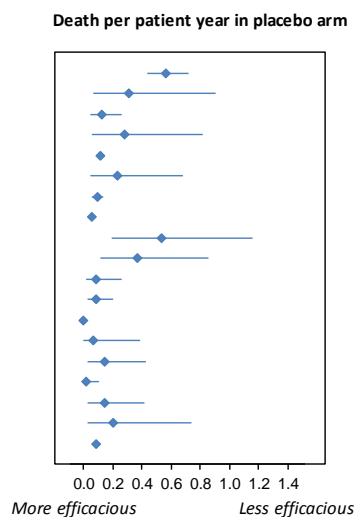

| Tx class | Trial               | Follow-up # (months) | # randomized | # completers | Person years at risk | Deaths | Rate (per patient year) | 95% CrI low | 95% CrI high |
|----------|---------------------|----------------------|--------------|--------------|----------------------|--------|-------------------------|-------------|--------------|
| PLBO     | CONSENSUS 1987      | 12.0                 | 126          | 108          | 117                  | 66     | 0.56                    | 0.72        | 0.44         |
| PLBO     | Chalmers 1987       | 3.0                  | 43           | 35           | 10                   | 3      | 0.31                    | 0.90        | 0.06         |
| PLBO     | Goldstein 1988      | 6.0                  | 100          | 100          | 50                   | 6      | 0.12                    | 0.26        | 0.04         |
| PLBO     | Lewis 1989          | 3.0                  | 43           | 43           | 11                   | 3      | 0.28                    | 0.82        | 0.06         |
| PLBO     | SOLVD treat 1991    | 55.0                 | 1284         | 752          | 4667                 | 510    | 0.11                    | 0.12        | 0.10         |
| PLBO     | Colfer 1992         | 3.0                  | 58           | 45           | 13                   | 3      | 0.23                    | 0.68        | 0.05         |
| PLBO     | MHFT 1992           | 36.5                 | 87           | 74           | 245                  | 22     | 0.09                    | 0.14        | 0.06         |
| PLBO     | SOLVD prevent 1992  | 48.0                 | 2117         | 1164         | 6563                 | 334    | 0.05                    | 0.06        | 0.05         |
| PLBO     | CASSIS 1995         | 3.0                  | 48           | 42           | 11                   | 6      | 0.53                    | 1.16        | 0.19         |
| PLBO     | Beller 1995         | 3.0                  | 63           | 46           | 14                   | 5      | 0.37                    | 0.85        | 0.12         |
| PLBO     | FEST 1995           | 3.0                  | 153          | 118          | 34                   | 3      | 0.09                    | 0.26        | 0.02         |
| PLBO     | Brown 1995          | 6.0                  | 125          | 74           | 50                   | 4      | 0.08                    | 0.21        | 0.02         |
| PLBO     | RALES (dosing) 1996 | 3.0                  | 40           | 40           | 10                   | 0      | 0.00                    | 0.00        | 0.00         |
| PLBO     | Veldhuisen 1998     | 3.0                  | 62           | 54           | 15                   | 1      | 0.07                    | 0.38        | 0.00         |
| PLBO     | Shettigar 1999      | 3.0                  | 104          | 60           | 21                   | 3      | 0.15                    | 0.43        | 0.03         |
| PLBO     | STRETCH 1999        | 3.0                  | 211          | 211          | 53                   | 1      | 0.02                    | 0.11        | 0.00         |
| PLBO     | SPICE 2000          | 3.0                  | 91           | 79           | 21                   | 3      | 0.14                    | 0.41        | 0.03         |
| PLBO     | Mitrovic 2003       | 3.0                  | 44           | 34           | 10                   | 2      | 0.21                    | 0.74        | 0.02         |
| PLBO     | CHARM-halt 2003     | 42.0                 | 1015         | 1015         | 3553                 | 296    | 0.08                    | 0.09        | 0.07         |

B)

Death per patient year in ACEI arm

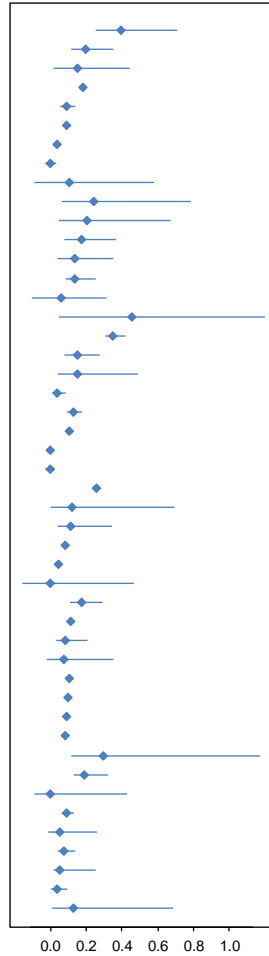

| Tx class | Trial              | Follow-up (months) | # randomized | # completers | Person years at risk | Deaths | Rate (per patient year) | 95% CrI low | 95% CrI high |
|----------|--------------------|--------------------|--------------|--------------|----------------------|--------|-------------------------|-------------|--------------|
| ACEI     | CONSENSUS 1987     | 12.0               | 127          | 105          | 116                  | 46     | 0.40                    | 0.53        | 0.29         |
| ACEI     | Chalmers 1987      | 3.0                | 87           | 72           | 20                   | 4      | 0.20                    | 0.52        | 0.05         |
| ACEI     | Goldstein 1988     | 6.0                | 104          | 104          | 52                   | 8      | 0.15                    | 0.30        | 0.07         |
| ACEI     | Lewis 1989         | 3.0                | 87           | 87           | 22                   | 4      | 0.18                    | 0.47        | 0.05         |
| ACEI     | SOLVD treat 1991   | 55.0               | 1285         | 867          | 4933                 | 452    | 0.09                    | 0.10        | 0.08         |
| ACEI     | MHFT 1992          | 40.4               | 83           | 59           | 239                  | 22     | 0.09                    | 0.14        | 0.06         |
| ACEI     | SOLVD prevent 1992 | 48.0               | 2111         | 1942         | 8106                 | 313    | 0.04                    | 0.04        | 0.03         |
| ACEI     | Colfer 1992        | 3.0                | 114          | 98           | 27                   | 0      | 0.00                    | 0.00        | 0.00         |
| ACEI     | CIBIS I 1994       | 26.0               | 321          | 239          | 607                  | 67     | 0.11                    | 0.14        | 0.09         |
| ACEI     | CASSIS 1995        | 3.0                | 51           | 47           | 12                   | 3      | 0.24                    | 0.72        | 0.05         |
| ACEI     | Dickstein 1995     | 2.0                | 58           | 58           | 10                   | 2      | 0.21                    | 0.75        | 0.02         |
| ACEI     | CASSIS 1995        | 3.0                | 48           | 42           | 11                   | 2      | 0.18                    | 0.64        | 0.02         |
| ACEI     | FEST 1995          | 3.0                | 155          | 127          | 35                   | 5      | 0.14                    | 0.33        | 0.05         |
| ACEI     | Beller 1995        | 3.0                | 130          | 105          | 29                   | 4      | 0.14                    | 0.35        | 0.04         |
| ACEI     | Brown 1995         | 6.0                | 116          | 81           | 49                   | 3      | 0.06                    | 0.18        | 0.01         |
| ACEI     | Krum 1995          | 3.5                | 16           | 14           | 4                    | 2      | 0.46                    | 1.65        | 0.05         |
| ACEI     | MOCHA 1996         | 6.0                | 84           | 63           | 37                   | 13     | 0.35                    | 0.60        | 0.19         |
| ACEI     | Packer 1996        | 6.0                | 398          | 398          | 199                  | 31     | 0.16                    | 0.22        | 0.11         |
| ACEI     | PRECISE 1996       | 6.0                | 145          | 145          | 73                   | 11     | 0.15                    | 0.27        | 0.08         |
| ACEI     | Colucci 1996       | 12.0               | 134          | 134          | 134                  | 5      | 0.04                    | 0.09        | 0.01         |
| ACEI     | Cohn 1997          | 6.0                | 35           | 27           | 16                   | 2      | 0.13                    | 0.47        | 0.01         |
| ACEI     | ELITE I 1997       | 11.0               | 370          | 259          | 288                  | 32     | 0.11                    | 0.16        | 0.08         |
| ACEI     | Lang 1997          | 3.0                | 38           | 38           | 10                   | 0      | 0.00                    | 0.00        | 0.00         |
| ACEI     | Veldhuisen 1998    | 3.0                | 60           | 56           | 15                   | 0      | 0.00                    | 0.00        | 0.00         |
| ACEI     | RALES 1999         | 24.0               | 841          | 630          | 1471                 | 386    | 0.26                    | 0.29        | 0.24         |
| ACEI     | Hamroff 1999       | 6.0                | 17           | 13           | 8                    | 1      | 0.13                    | 0.70        | 0.00         |
| ACEI     | MERIT-HF 1999      | 12.0               | 2001         | 1691         | 1846                 | 217    | 0.12                    | 0.13        | 0.10         |
| ACEI     | Shettigar 1999     | 3.0                | 102          | 85           | 23                   | 2      | 0.09                    | 0.31        | 0.01         |
| ACEI     | CIBIS II 1999      | 46.0               | 1320         | 1320         | 5063                 | 228    | 0.05                    | 0.05        | 0.04         |
| ACEI     | Goldstein 1999     | 6.0                | 19           | 16           | 9                    | 0      | 0.00                    | 0.00        | 0.00         |
| ACEI     | MIC 2000           | 6.0                | 26           | 19           | 11                   | 2      | 0.18                    | 0.64        | 0.02         |
| ACEI     | Sturm 2000         | 24.0               | 49           | 20           | 69                   | 8      | 0.12                    | 0.23        | 0.05         |
| ACEI     | ELITE II 2000      | 24.0               | 1574         | 1353         | 2927                 | 250    | 0.09                    | 0.10        | 0.08         |
| ACEI     | CELICARD 2000      | 12.0               | 66           | 39           | 53                   | 4      | 0.08                    | 0.20        | 0.02         |
| ACEI     | REPLACE 2001       | 3.0                | 75           | 75           | 19                   | 2      | 0.11                    | 0.39        | 0.01         |
| ACEI     | COPERNICUS 2001    | 21.0               | 1133         | 953          | 1825                 | 190    | 0.10                    | 0.12        | 0.09         |
| ACEI     | BEST 2001          | 42.0               | 1354         | 1351         | 4734                 | 449    | 0.09                    | 0.10        | 0.09         |
| ACEI     | Val-HeFT 2001      | 27.0               | 2499         | 2499         | 5623                 | 484    | 0.09                    | 0.09        | 0.08         |
| ACEI     | HEAVEN 2002        | 3.0                | 71           | 62           | 17                   | 5      | 0.30                    | 0.70        | 0.10         |
| ACEI     | de Milliano 2002   | 6.0                | 11           | 10           | 5                    | 1      | 0.19                    | 1.06        | 0.00         |
| ACEI     | Dubach 2002        | 12.0               | 15           | 15           | 15                   | 0      | 0.00                    | 0.00        | 0.00         |
| ACEI     | SYMFOXYDEX 2004    | 6.0                | 22           | 21           | 11                   | 1      | 0.09                    | 0.52        | 0.00         |
| ACEI     | CARMEN 2004        | 18.0               | 190          | 133          | 242                  | 14     | 0.06                    | 0.10        | 0.03         |
| ACEI     | Palazzuoli 2005b   | 12.0               | 27           | 24           | 26                   | 2      | 0.08                    | 0.28        | 0.01         |
| ACEI     | ENECA 2005         | 11.0               | 126          | 112          | 119                  | 7      | 0.06                    | 0.12        | 0.02         |
| ACEI     | Palazzuoli 2005    | 12.0               | 25           | 22           | 24                   | 1      | 0.04                    | 0.24        | 0.00         |
| ACEI     | CIBIS III 2008     | 6.0                | 505          | 456          | 240                  | 32     | 0.13                    | 0.19        | 0.09         |

More efficacious      Less efficacious

C)

Death per patient year in other arms

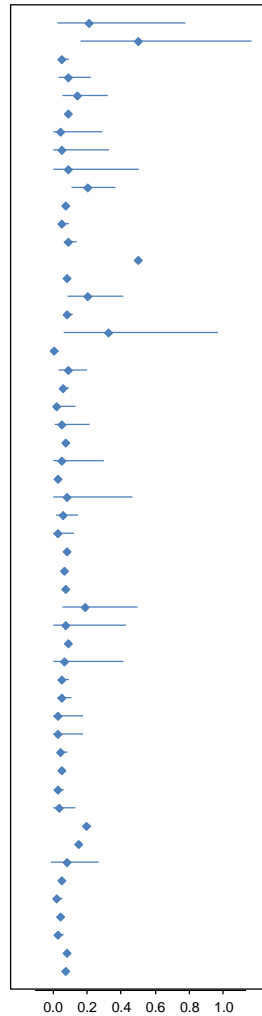

More efficacious      Less efficacious

| Tx class        | Trial            | Follow-up (months) | # randomized | # completers | Person years at risk | Deaths | Rate (per patient year) | 95% CrI low | 95% CrI high |
|-----------------|------------------|--------------------|--------------|--------------|----------------------|--------|-------------------------|-------------|--------------|
| ARB             | Dickstein 1995   | 2.0                | 56           | 56           | 9                    | 2      | 0.21                    | 0.77        | 0.02         |
| ARB             | Lang 1997        | 3.0                | 40           | 40           | 10                   | 5      | 0.50                    | 1.17        | 0.16         |
| ARB             | ELITE I 1997     | 11.0               | 352          | 287          | 293                  | 17     | 0.06                    | 0.09        | 0.03         |
| ARB             | STRETCH 1999     | 3.0                | 213          | 213          | 53                   | 5      | 0.09                    | 0.22        | 0.03         |
| ARB             | SPICE 2000       | 3.0                | 179          | 148          | 41                   | 6      | 0.15                    | 0.32        | 0.05         |
| ARB             | ELITE II 2000    | 24.0               | 1578         | 1453         | 3031                 | 280    | 0.09                    | 0.10        | 0.08         |
| ARB             | REPLACE 2001     | 3.0                | 77           | 77           | 19                   | 1      | 0.05                    | 0.29        | 0.00         |
| ARB             | HEAVEN 2002      | 3.0                | 70           | 65           | 17                   | 1      | 0.06                    | 0.33        | 0.00         |
| ARB             | Mitrovic 2003    | 3.0                | 44           | 44           | 11                   | 1      | 0.09                    | 0.51        | 0.00         |
| ARB             | RESOLVD 2003     | 6.0                | 126          | 122          | 57                   | 12     | 0.21                    | 0.37        | 0.11         |
| ARB             | CHARM-alt 2003   | 42.0               | 1013         | 1013         | 3546                 | 265    | 0.07                    | 0.08        | 0.07         |
| BB              | CARMEN 2004      | 18.0               | 191          | 134          | 244                  | 14     | 0.06                    | 0.10        | 0.03         |
| BB              | CIBIS III 2008   | 6.0                | 505          | 470          | 244                  | 23     | 0.09                    | 0.14        | 0.06         |
| ACEI + ARB      | Hamroff 1999     | 6.0                | 16           | 13           | 7                    | 5      | 0.50                    | 0.00        | 0.00         |
| ACEI + ARB      | Val-HeFT 2001    | 27.0               | 2511         | 2511         | 5650                 | 495    | 0.09                    | 0.10        | 0.08         |
| ACEI + ARB      | RESOLVD 2003     | 6.0                | 86           | 82           | 39                   | 8      | 0.21                    | 0.41        | 0.09         |
| ACEI + BB       | CIBIS I 1994     | 26.0               | 320          | 245          | 612                  | 53     | 0.09                    | 0.11        | 0.06         |
| ACEI + BB       | Krum 1995        | 3.5                | 33           | 29           | 9                    | 3      | 0.33                    | 0.97        | 0.07         |
| ACEI + BB       | Colucci 1996     | 12.0               | 232          | 232          | 232                  | 2      | 0.01                    | 0.03        | 0.00         |
| ACEI + BB       | PRECISE 1996     | 6.0                | 133          | 133          | 67                   | 6      | 0.09                    | 0.20        | 0.03         |
| ACEI + BB       | Packer 1996      | 6.0                | 696          | 696          | 348                  | 22     | 0.06                    | 0.10        | 0.04         |
| ACEI + BB       | MOCHA 1996       | 6.0                | 89           | 82           | 43                   | 1      | 0.02                    | 0.13        | 0.00         |
| ACEI + BB       | Cohn 1997        | 6.0                | 70           | 66           | 34                   | 2      | 0.06                    | 0.21        | 0.01         |
| ACEI + BB       | MERIT-HF 1999    | 12.0               | 1990         | 1711         | 1851                 | 145    | 0.08                    | 0.09        | 0.07         |
| ACEI + BB       | Goldstein 1999   | 6.0                | 42           | 33           | 19                   | 1      | 0.05                    | 0.30        | 0.00         |
| ACEI + BB       | CIBIS II 1999    | 46.0               | 1327         | 1327         | 5090                 | 156    | 0.03                    | 0.04        | 0.03         |
| ACEI + BB       | MIC 2000         | 6.0                | 26           | 22           | 12                   | 1      | 0.08                    | 0.46        | 0.00         |
| ACEI + BB       | Sturm 2000       | 24.0               | 51           | 28           | 79                   | 5      | 0.06                    | 0.15        | 0.02         |
| ACEI + BB       | CELICARD 2000    | 12.0               | 66           | 48           | 57                   | 2      | 0.04                    | 0.13        | 0.00         |
| ACEI + BB       | BEST 2001        | 42.0               | 1354         | 1349         | 4730                 | 411    | 0.09                    | 0.10        | 0.08         |
| ACEI + BB       | COPERNICUS 2001  | 21.0               | 1156         | 1010         | 1896                 | 130    | 0.07                    | 0.08        | 0.06         |
| ACEI + BB       | Cicoira 2002     | 12.0               | 52           | 46           | 49                   | 4      | 0.08                    | 0.21        | 0.02         |
| ACEI + BB       | de Millano 2002  | 6.0                | 43           | 39           | 21                   | 4      | 0.20                    | 0.50        | 0.05         |
| ACEI + BB       | Dubach 2002      | 12.0               | 13           | 13           | 13                   | 1      | 0.08                    | 0.43        | 0.00         |
| ACEI + BB       | CHARM-added 2003 | 42.0               | 1272         | 1272         | 4452                 | 412    | 0.09                    | 0.10        | 0.08         |
| ACEI + BB       | SYMPOXYDEX 2004  | 6.0                | 28           | 26           | 14                   | 1      | 0.07                    | 0.41        | 0.00         |
| ACEI + BB       | CARMEN 2004      | 18.0               | 191          | 132          | 242                  | 14     | 0.06                    | 0.10        | 0.03         |
| ACEI + BB       | ENECA 2005       | 12.0               | 134          | 124          | 129                  | 7      | 0.05                    | 0.11        | 0.02         |
| ACEI + BB       | Palazzuoli 2005b | 12.0               | 32           | 30           | 31                   | 1      | 0.03                    | 0.18        | 0.00         |
| ACEI + BB       | Palazzuoli 2005  | 12.0               | 33           | 31           | 32                   | 1      | 0.03                    | 0.17        | 0.00         |
| ACEI + BB       | AREA-IN CHF 2009 | 12.0               | 236          | 236          | 236                  | 12     | 0.05                    | 0.09        | 0.03         |
| ACEI + BB       | EMPHASIS-HF 2011 | 36.0               | 1373         | 1145         | 3777                 | 213    | 0.06                    | 0.06        | 0.05         |
| ACEI + BB       | Vlzzardi 2014    | 44.0               | 65           | 65           | 238                  | 8      | 0.03                    | 0.07        | 0.01         |
| ARB + BB        | RESOLVD 2003     | 6.0                | 125          | 108          | 53                   | 2      | 0.04                    | 0.13        | 0.00         |
| ACEI + MRA      | RALES 1999       | 24.0               | 822          | 600          | 1422                 | 284    | 0.20                    | 0.22        | 0.18         |
| ACEI + ARB + BB | RESOLVD 2003     | 6.0                | 89           | 77           | 38                   | 6      | 0.16                    | 0.34        | 0.06         |
| ACEI + ARB + BB | CHARM-added 2003 | 42.0               | 1276         | 1276         | 4466                 | 377    | 0.08                    | 0.09        | 0.08         |
| ACEI + BB + MRA | Cicoira 2002     | 12.0               | 54           | 47           | 51                   | 3      | 0.06                    | 0.17        | 0.01         |
| ACEI + BB + MRA | AREA-IN CHF 2009 | 12.0               | 231          | 231          | 231                  | 6      | 0.03                    | 0.06        | 0.01         |
| ACEI + BB + MRA | EMPHASIS-HF 2011 | 36.0               | 1364         | 1142         | 3759                 | 171    | 0.05                    | 0.05        | 0.04         |
| ACEI + BB + MRA | Vlzzardi 2014    | 44.0               | 65           | 65           | 238                  | 8      | 0.03                    | 0.07        | 0.01         |
| ACEI + BB + MRA | PARADIGM-HF 2014 | 27.0               | 4212         | 4203         | 9467                 | 835    | 0.09                    | 0.09        | 0.08         |
| ARNI + BB + MRA | PARADIGM-HF 2014 | 27.0               | 4187         | 4176         | 9408                 | 711    | 0.08                    | 0.08        | 0.07         |

**Supplementary Figure 3: Results of random effect network meta-analysis probability rank for all-cause mortality**

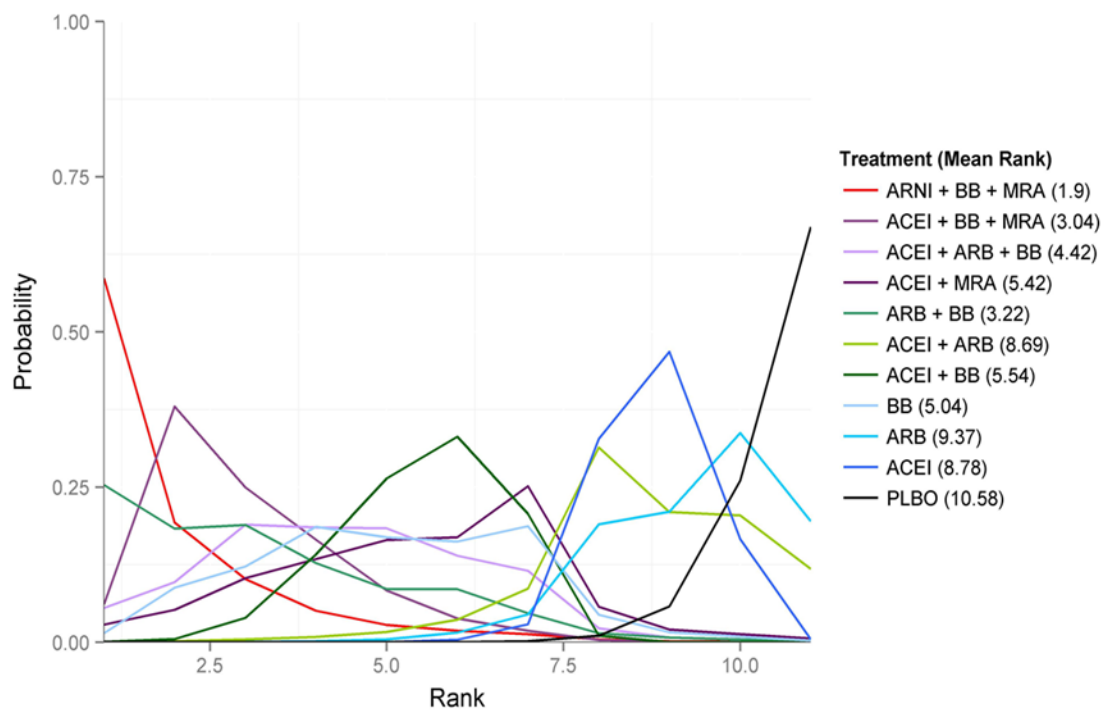

## **Supplemental References**

### **(List of Studies Included in the Systematic Literature Review and Network Meta-Analysis)**

1. Widimsky J, Kremer HJ, Jerie P and Uhlir O. Czech and Slovak spirapril intervention study (CASSIS). A randomized, placebo and active-controlled, double-blind multicentre trial in patients with congestive heart failure. *Eur. J. Clin. Pharmacol.* 1995;49:95-102.
2. Swedberg K. Effects of enalapril on mortality in severe congestive heart failure. Results of the Cooperative North Scandinavian Enalapril Survival Study (CONSENSUS). The CONSENSUS Trial Study Group. *N. Engl. J. Med.* 1987;316:1429-35.
3. Erhardt L, MacLean A, Ilgenfritz J, Gelperin K and Blumenthal M. Fosinopril attenuates clinical deterioration and improves exercise tolerance in patients with heart failure. Fosinopril Efficacy/Safety Trial (FEST) Study Group. *Eur. Heart J.* 1995;16:1892-9.
4. Kleber FX and Niemoller L. Long-term survival in the Munich Mild Heart Failure Trial (MHFT). *Am. J. Cardiol.* 1993;71:1237-9.
5. Yusuf S. Effect of enalapril on mortality and the development of heart failure in asymptomatic patients with reduced left ventricular ejection fractions. The SOLVD Investigators. *N. Engl. J. Med.* 1992;327:685-91.
6. S. Y. Effect of enalapril on survival in patients with reduced left ventricular ejection fractions and congestive heart failure. The SOLVD Investigators. *N. Engl. J. Med.* 1991;325:293-302.
7. Beller B, Bulle T, Bourge RC, Colfer H, Fowles RE, Giles TD, Grover J, Whipple JP, Fisher MB, Jessup M and et al. Lisinopril versus placebo in the treatment of heart failure: the Lisinopril Heart Failure Study Group. *J. Clin. Pharmacol.* 1995;35:673-80.
8. Brown EJ, Jr., Chew PH, MacLean A, Gelperin K, Ilgenfritz JP and Blumenthal M. Effects of fosinopril on exercise tolerance and clinical deterioration in patients with chronic congestive heart failure not taking digitalis. Fosinopril Heart Failure Study Group. *Am. J. Cardiol.* 1995;75:596-600.
9. Chalmers JP, West MJ, Cyran J, De La Torre D, Englert M, Kramar M, Lewis GR, Maranhao MF, Myburgh DP, Schuster P and et al. Placebo-controlled study of lisinopril in congestive heart failure: a multicentre study. *J. Cardiovasc. Pharmacol.* 1987;9 Suppl 3:S89-97.

10. Colfer HT, Ribner HS, Gradman A, Hughes CV, Kapoor A and Laidlaw JC. Effects of once-daily benazepril therapy on exercise tolerance and manifestations of chronic congestive heart failure. The Benazepril Heart Failure Study Group. *Am. J. Cardiol.* 1992;70:354-8.
11. Anonymous. Comparative effects of therapy with captopril and digoxin in patients with mild to moderate heart failure. The Captopril-Digoxin Multicenter Research Group. *JAMA.* 1988;259:539-44.
12. Lewis GR. Comparison of lisinopril versus placebo for congestive heart failure. *Am. J. Cardiol.* 1989;63:12D-16D.
13. Shettigar U, Hare T, Gelperin K, Ilgenfritz JP, Deitchman D and Blumenthal M. Effects of fosinopril on exercise tolerance, symptoms, and clinical outcomes in patients with decompensated heart failure. *Congest Heart Fail.* 1999;5:27-34.
14. van Veldhuisen DJ, Genth-Zotz S, Brouwer J, Boomsma F, Netzer T, Man In TVAJ, Pinto YM, Lie KI and Crijns HJ. High- versus low-dose ACE inhibition in chronic heart failure: a double-blind, placebo-controlled study of imidapril. *J. Am. Coll. Cardiol.* 1998;32:1811-8.
15. Granger CB, Ertl G, Kuch J, Maggioni AP, McMurray J, Rouleau JL, Stevenson LW, Swedberg K, Young J, Yusuf S, Califf RM, Bart BA, Held P, Michelson EL, Sellers MA, Ohlin G, Sparapani R and Pfeffer MA. Randomized trial of candesartan cilexetil in the treatment of patients with congestive heart failure and a history of intolerance to angiotensin-converting enzyme inhibitors. *Am. Heart J.* 2000;139:609-17.
16. Riegger GA, Bouzo H, Petr P, Munz J, Spacek R, Pethig H, von Behren V, George M and Arens H. Improvement in exercise tolerance and symptoms of congestive heart failure during treatment with candesartan cilexetil. Symptom, Tolerability, Response to Exercise Trial of Candesartan Cilexetil in Heart Failure (STRETCH) Investigators. *Circulation.* 1999;100:2224-30.
17. Mitrovic V, Willenbrock R, Miric M, Seferovic P, Spinar J, Dabrowski M, Kiowski W, Marks DS, Alegria E, Dukat A, Lenz K and Arens HA. Acute and 3-month treatment effects of candesartan cilexetil on hemodynamics, neurohormones, and clinical symptoms in patients with congestive heart failure. *Am. Heart J.* 2003;145:E14.
18. Pitt B, Segal R, Martinez FA, Meurers G, Cowley AJ, Thomas I, Deedwania PC, Ney DE, Snavely DB and Chang PI. Randomised trial of losartan versus captopril in patients over 65 with heart failure (Evaluation of Losartan in the Elderly Study, ELITE). *Lancet.* 1997;349:747-52.
19. Pitt B, Poole-Wilson PA, Segal R, Martinez FA, Dickstein K, Camm AJ, Konstam MA, Riegger G, Klingler GH, Neaton J, Sharma D and Thiyagarajan B. Effect of losartan compared with captopril on



mortality in patients with symptomatic heart failure: randomised trial--the Losartan Heart Failure Survival Study ELITE II. *Lancet*. 2000;355:1582-7.

20. Dunselman PH and Replacement of Angiotensin Converting Enzyme Inhibition I. Effects of the replacement of the angiotensin converting enzyme inhibitor enalapril by the angiotensin II receptor blocker telmisartan in patients with congestive heart failure. The replacement of angiotensin converting enzyme inhibition (REPLACE) investigators. *Int. J. Cardiol*. 2001;77:131-8; discussion 139-40.

21. Dickstein K, Chang P, Willenheimer R, Haunso S, Remes J, Hall C and Kjekshus J. Comparison of the effects of losartan and enalapril on clinical status and exercise performance in patients with moderate or severe chronic heart failure. *J. Am. Coll. Cardiol*. 1995;26:438-45.

22. Lang RM, Elkayam U, Yellen LG, Krauss D, McKelvie RS, Vaughan DE, Ney DE, Makris L and Chang PI. Comparative effects of losartan and enalapril on exercise capacity and clinical status in patients with heart failure. The Losartan Pilot Exercise Study Investigators. *J. Am. Coll. Cardiol*. 1997;30:983-91.

23. Dobre D, van Veldhuisen DJ, Goulder MA, Krum H and Willenheimer R. Clinical effects of initial 6 months monotherapy with bisoprolol versus enalapril in the treatment of patients with mild to moderate chronic heart failure. Data from the CIBIS III Trial. *Cardiovasc. Drug Ther*. 2008;22:399-405.

24. Komajda M, Lutiger B, Madeira H, Thygesen K, Bobbio M, Hildebrandt P, Jaarsma W, Riegger G, Ryden L, Scherhag A, Soler-Soler J, Remme WJ, investigators C and co o. Tolerability of carvedilol and ACE-Inhibition in mild heart failure. Results of CARMEN (Carvedilol ACE-Inhibitor Remodelling Mild CHF EvaluationN). *Eur. J. Heart Fail*. 2004;6:467-75.

25. Granger CB, McMurray JJ, Yusuf S, Held P, Michelson EL, Olofsson B, Ostergren J, Pfeffer MA, Swedberg K, Investigators C and Committees. Effects of candesartan in patients with chronic heart failure and reduced left-ventricular systolic function intolerant to angiotensin-converting-enzyme inhibitors: the CHARM-Alternative trial. *Lancet*. 2003;362:772-6.

26. Willenheimer R, Helmers C, Pantev E, Rydberg E, Lofdahl P, Gordon A and Heart Failure Valsartan Exercise Capacity Evaluation Study G. Safety and efficacy of valsartan versus enalapril in heart failure patients. *Int. J. Cardiol*. 2002;85:261-70.

27. Pitt B, Zannad F, Remme WJ, Cody R, Castaigne A, Perez A, Palensky J and Wittes J. The effect of spironolactone on morbidity and mortality in patients with severe heart failure. Randomized Aldactone Evaluation Study Investigators. *N. Engl. J. Med*. 1999;341:709-17.

28. Cohn JN, Tognoni G and Valsartan Heart Failure Trial I. A randomized trial of the angiotensin-receptor blocker valsartan in chronic heart failure. *N. Engl. J. Med*. 2001;345:1667-75.

29. Hamroff G, Katz SD, Mancini D, Blaufarb I, Bijou R, Patel R, Jondeau G, Olivari MT, Thomas S and Le Jemtel TH. Addition of angiotensin II receptor blockade to maximal angiotensin-converting enzyme inhibition improves exercise capacity in patients with severe congestive heart failure. *Circulation*. 1999;99:990-2.
30. Eichhorn EJ. A trial of the beta-blocker bucindolol in patients with advanced chronic heart failure. *N. Engl. J. Med.* 2001;344:1659-67.
31. Lachat P. A randomized trial of beta-blockade in heart failure. The Cardiac Insufficiency Bisoprolol Study (CIBIS). CIBIS Investigators and Committees. *Circulation*. 1994;90:1765-73.
32. Lechat P. The Cardiac Insufficiency Bisoprolol Study II (CIBIS-II): a randomised trial. *Lancet*. 1999;353:9-13.
33. Witchitz S, Cohen-Solal A, Dartois N, Weisslinger N, Juste K and Darmon JY. Treatment of heart failure with celiprolol, a cardioselective beta blocker with beta-2 agonist vasodilatory properties. The CELICARD Group. *Am. J. Cardiol.* 2000;85:1467-71.
34. Krum H, Roecker EB, Mohacsi P, Rouleau JL, Tendera M, Coats AJ, Katus HA, Fowler MB, Packer M and Carvedilol Prospective Randomized Cumulative Survival Study G. Effects of initiating carvedilol in patients with severe chronic heart failure: results from the COPERNICUS Study. *JAMA*. 2003;289:712-8.
35. Edes I, Gasior Z and Wita K. Effects of nebivolol on left ventricular function in elderly patients with chronic heart failure: results of the ENECA study. *Eur. J. Heart Fail.* 2005;7:631-9.
36. Hjalmarson A. Effect of metoprolol CR/XL in chronic heart failure: Metoprolol CR/XL Randomised Intervention Trial in Congestive Heart Failure (MERIT-HF). *Lancet*. 1999;353:2001-7.
37. Goldstein S, Kennedy HL, Hall C, Anderson JL, Gheorghide M, Gottlieb S, Jessup M, Karlsberg RP, Friday G and Haskell L. Metoprolol CR/XL in patients with heart failure: A pilot study examining the tolerability, safety, and effect on left ventricular ejection fraction. *Am. Heart J.* 1999;138:1158-65.
38. Genth-Zotz S, Zotz RJ, Sigmund M, Hanrath P, Hartmann D, Bohm M, Waagstein F, Treese N, Meyer J and Darius H. MIC trial: metoprolol in patients with mild to moderate heart failure: effects on ventricular function and cardiopulmonary exercise testing. *Eur. J. Heart Fail.* 2000;2:175-81.
39. Bristow MR, Gilbert EM, Abraham WT, Adams KF, Fowler MB, Hershberger RE, Kubo SH, Narahara KA, Ingersoll H, Krueger S, Young S and Shusterman N. Carvedilol produces dose-related improvements in left ventricular function and survival in subjects with chronic heart failure. MOCHA Investigators. *Circulation*. 1996;94:2807-16.

40. Packer M, Colucci WS, Sackner-Bernstein JD, Liang CS, Goldscher DA, Freeman I, Kukin ML, Kinhal V, Udelson JE, Klapholz M, Gottlieb SS, Pearle D, Cody RJ, Gregory JJ, Kantrowitz NE, LeJemtel TH, Young ST, Lukas MA and Shusterman NH. Double-blind, placebo-controlled study of the effects of carvedilol in patients with moderate to severe heart failure. The PRECISE Trial. Prospective Randomized Evaluation of Carvedilol on Symptoms and Exercise. *Circulation*. 1996;94:2793-9.
41. Cohen Solal A, Jondeau G, Beauvais F and Berdeaux A. Beneficial effects of carvedilol on angiotensin-converting enzyme activity and renin plasma levels in patients with chronic heart failure. *Eur. J. Heart Fail*. 2004;6:463-6.
42. Cohn JN, Fowler MB, Bristow MR, Colucci WS, Gilbert EM, Kinhal V, Krueger SK, Lejemtel T, Narahara KA, Packer M, Young ST, Holcslaw TL and Lukas MA. Safety and efficacy of carvedilol in severe heart failure. The U.S. Carvedilol Heart Failure Study Group. *J. Card. Fail*. 1997;3:173-9.
43. Colucci WS, Packer M, Bristow MR, Gilbert EM, Cohn JN, Fowler MB, Krueger SK, Hershberger R, Uretsky BF, Bowers JA, Sackner-Bernstein JD, Young ST, Holcslaw TL and Lukas MA. Carvedilol inhibits clinical progression in patients with mild symptoms of heart failure. US Carvedilol Heart Failure Study Group. *Circulation*. 1996;94:2800-6.
44. de Milliano PA, de Groot AC, Tijssen JG, van Eck-Smit BL, Van Zwieten PA and Lie KI. Beneficial effects of metoprolol on myocardial sympathetic function: Evidence from a randomized, placebo-controlled study in patients with congestive heart failure. *Am. Heart J*. 2002;144:E3.
45. Dubach P, Myers J, Bonetti P, Schertler T, Froelicher V, Wagner D, Scheidegger M, Stuber M, Luchinger R, Schwitter J and Hess O. Effects of bisoprolol fumarate on left ventricular size, function, and exercise capacity in patients with heart failure: analysis with magnetic resonance myocardial tagging. *Am. Heart J*. 2002;143:676-83.
46. Krum H, Sackner-Bernstein JD, Goldsmith RL, Kukin ML, Schwartz B, Penn J, Medina N, Yushak M, Horn E, Katz SD and et al. Double-blind, placebo-controlled study of the long-term efficacy of carvedilol in patients with severe chronic heart failure. *Circulation*. 1995;92:1499-506.
47. Packer M, Bristow MR, Cohn JN, Colucci WS, Fowler MB, Gilbert EM and Shusterman NH. The effect of carvedilol on morbidity and mortality in patients with chronic heart failure. U.S. Carvedilol Heart Failure Study Group. *N. Engl. J. Med*. 1996;334:1349-55.
48. Palazzuoli A, Quatrini I, Vecchiato L, Calabria P, Gennari L, Martini G and Nuti R. Left ventricular diastolic function improvement by carvedilol therapy in advanced heart failure. *J. Cardiovasc. Pharmacol*. 2005;45:563-8.

49. Palazzuoli A, Quatrini I, Vecchiato L, Scali C, De Paola V, Iovine F, Martini G and Nuti R. Effects of carvedilol on left ventricular diastolic function and chamber volumes in advanced heart failure. *Minerva Cardioangiol.* 2005;53:321-8.
50. Sturm B, Pacher R, Strametz-Juranek J, Berger R, Frey B and Stanek B. Effect of beta 1 blockade with atenolol on progression of heart failure in patients pretreated with high-dose enalapril. *Eur. J. Heart Fail.* 2000;2:407-12.
51. McKelvie RS, Rouleau JL, White M, Afzal R, Young JB, Maggioni AP, Held P and Yusuf S. Comparative impact of enalapril, candesartan or metoprolol alone or in combination on ventricular remodelling in patients with congestive heart failure. *Eur. Heart J.* 2003;24:1727-34.
52. White M. Effects of metoprolol CR in patients with ischemic and dilated cardiomyopathy : the randomized evaluation of strategies for left ventricular dysfunction pilot study. *Circulation.* 2000;101:378-84.
53. McMurray JJ, Ostergren J, Swedberg K, Granger CB, Held P, Michelson EL, Olofsson B, Yusuf S, Pfeffer MA, Investigators C and Committees. Effects of candesartan in patients with chronic heart failure and reduced left-ventricular systolic function taking angiotensin-converting-enzyme inhibitors: the CHARM-Added trial. *Lancet.* 2003;362:767-71.
54. Boccanelli A, Mureddu GF, Cacciatore G, Clemenza F, Di Lenarda A, Gavazzi A, Porcu M, Latini R, Lucci D, Maggioni AP, Masson S, Vanasia M, de Simone G and Investigators AI-C. Anti-remodelling effect of canrenone in patients with mild chronic heart failure (AREA IN-CHF study): final results. *Eur. J. Heart Fail.* 2009;11:68-76.
55. Zannad F, McMurray JJ, Krum H, van Veldhuisen DJ, Swedberg K, Shi H, Vincent J, Pocock SJ, Pitt B and Group E-HS. Eplerenone in patients with systolic heart failure and mild symptoms. *N. Engl. J. Med.* 2011;364:11-21.
56. Ciccoira M, Zanolla L, Rossi A, Golia G, Franceschini L, Brighetti G, Marino P and Zardini P. Long-term, dose-dependent effects of spironolactone on left ventricular function and exercise tolerance in patients with chronic heart failure. *J. Am. Coll. Cardiol.* 2002;40:304-10.
57. Vizzardi E, Nodari S, Caretta G, D'Aloia A, Pezzali N, Faden G, Lombardi C, Raddino R, Metra M and Dei Cas L. Effects of spironolactone on long-term mortality and morbidity in patients with heart failure and mild or no symptoms. *Am. J. Med. Sci.* 2014;347:271-6.

58. McMurray JJ, Packer M, Desai AS, Gong J, Lefkowitz MP, Rizkala AR, Rouleau JL, Shi VC, Solomon SD, Swedberg K, Zile MR, Investigators P-H and Committees. Angiotensin-neprilysin inhibition versus enalapril in heart failure. *N. Engl. J. Med.* 2014;371:993-1004.
